# Supplementary material for: Peptide precursors that acquire denatured collagen-hybridizing ability by O-to-N acyl migration at physiological pH
Source: Royal Society of Chemistry journal article supplement (doi:10.1039/c9ob02136a), 2020-01-01
Supplement: c9ob02136a1.pdf [file c9ob02136a1.pdf]

## Supporting information

Peptide precursors that acquire denatured collagen-hybridizing ability by *O*-to-*N* acyl migration at physiological pH

Sayaka Kanai, Koshi Machida, Ryo Masuda, and Takaki Koide

### General reagents

Resins, Fmoc-Hyp(tBu)-OH, Fmoc-Pro-OH, Fmoc-Ser(tBu)-OH, Fmoc-Tyr(tBu)-OH, Fmoc-β-Ala-OH, and Fmoc-Cys(Acm)-OH were obtained from Novabiochem (San Diego, CA, USA). Fmoc-Lys(Mtt)-OH and Fmoc-(Pro-Hyp-Gly)-OH were obtained from Watanabe Chemical Industries, Ltd (Hiroshima, Japan). Boc-Ser-(Fmoc-Gly)-OH was obtained from Iris Biotech GmbH (Marktredwitz, Germany). Boc-Thr-(Fmoc-Gly)-OH, ethanedithiol, and *m*-cresol were obtained from Sigma Aldrich (St. Louis, MO, USA). *N,N'*-diisopropylcarbodiimide (DIC), *N*-hydroxybenzotriazole (HOBt), piperidine, acetic acid (AcOH), acetic anhydride, and pyridine were obtained from Wako Pure Chemical Industries (Osaka, Japan). D-biotin, *N,N*-dimethylformamide (DMF), and trifluoroacetic acid (TFA) were obtained from Nacalai Tesque (Kyoto, Japan). Fmoc-NH-PEG<sub>2</sub>-CH<sub>2</sub>CH<sub>2</sub>-OH and thioanisole were obtained from Tokyo Chemical Industry (Tokyo, Japan).

### Solid phase peptide synthesis

All peptides were synthesized by the Fmoc-based solid phase method on Rink amide resin. Fmoc amino acids were condensed in the presence of DIC and HOBt in DMF for 2 h. The protected amino acids used were Fmoc-Tyr(tBu)-OH, Fmoc-Pro-OH, Fmoc-Hyp(tBu)-OH, Fmoc-Gly-OH, Fmoc-Ser(tBu)-OH, Fmoc-Cys(Acm)-OH, and Fmoc-β-Ala-OH (5 eq); Boc-Ser-(Fmoc-Gly)-OH and Boc-Thr-(Fmoc-Gly)-OH (2.5 eq); and Fmoc-(Pro-Hyp-Gly)-OH and Fmoc-Lys(Mtt)-OH (3 eq). DIC and HOBt were used in equivalent amounts to each amino acid. The Fmoc group was removed with 20% or 30% (v/v) piperidine in DMF for 15 min. The *N*-terminus was acetylated with acetic anhydride (20 eq) and pyridine (20 eq) in DMF for 30 min. For the biotinylation of the *N*-terminus or side chain of Lys, Fmoc-NH-PEG<sub>2</sub>-CH<sub>2</sub>CH<sub>2</sub>-OH (2.5 eq), used as a linker, was condensed by the same method used for the Fmoc amino acids. D-biotin was condensed in the presence of DIC and HOBt in dimethyl sulfoxide (DMSO) for 2 h. The Mtt group was removed from the side chain of Lys with dichloromethane (DCM)/1,1,1,3,3,3-hexafluoro-2-propanol/2,2,2-trifluoroethanol/triethylsilane (13/4/2/1, v/v) for 2 h. Peptides were cleaved from the resin with TFA/H<sub>2</sub>O/*m*-cresol/thioanisole (85/5/5/5, v/v) for 2 h. Cyclic CMPs were synthesized following a similar method to the single-strand CMPs. Boc-Ser-(Fmoc-Gly)-OH was condensed with DIC and HOBt in DCM. The Fmoc group of the second amino acid residue from the *N*-terminal end next to the ester bond was removed using 1-methylpyrrolidine (25% v/v)/hexamethyleneimine (2% v/v)/HOBt (3% w/v) in *N*-methylpyrrolidone (NMP): DMSO (1:1).<sup>1</sup> The

peptides were cleaved from the resin with TFA/H<sub>2</sub>O/*m*-cresol/thioanisole/ethanedithiol (82.5/5/5/5/2.5, v/v) for 2 h. Cyclization of the peptides was performed using 1 mg/mL I<sub>2</sub>/80% AcOH: 8 M guanidinium chloride (1:3) for 1 h at room temperature and the reaction was quenched by ascorbic acid.

The peptides were purified by reversed phase high-performance liquid chromatography (RP-HPLC) using a COSMOSIL 5C<sub>18</sub>-AR-II column (Nacalai Tesque, 4.6 × 250 mm) at 60 °C with a linear gradient of 0.05% TFA/acetonitrile (CH<sub>3</sub>CN) and 0.05% TFA/H<sub>2</sub>O. Triple TOF 4600 (AB SCIEX, USA) electrospray ionization mass spectrometry (ESI) MS were used for mass spectrometric analysis.

#### Measurement of peptide concentration

The concentration of peptide in solution was determined based on the absorption at 280 nm.<sup>2</sup>

#### NMR analysis

**1** (7.8 mg) and **2** (8.7 mg) were dissolved in methanol-*d*<sub>4</sub> (750 μL). NMR spectra were recorded at 298 K using an AVANCE 600 spectrometer (Bruker BioSpin, USA).

#### O-to-N acyl migration under physiological conditions

Compound **3** in 1 mM AcOH/H<sub>2</sub>O was incubated in 90% fetal bovine serum (FBS) at 37 °C for 5 min. TFA (12.5%) was added to the solution to precipitate serum protein. Following centrifugation at 15,000 rpm for 10 min, the supernatants were analyzed by RP-HPLC.

#### Fourier transform infrared Spectroscopy (FT-IR)

FT-IR spectra of **1**, **2**, **3** and **4** were measured with a FT/IR-4200 (JASCO, Tokyo, Japan). The spectra of **8** and **9** were measured with an IRSpirit (Shimadzu, Kyoto, Japan). Peptide sample (approximately 500 μg) was mixed with KBr (approximately 120 mg) and then pressed at 3 tons for 1 min to obtain a pellet.

#### Circular dichroism (CD) spectroscopy

CD spectra were measured by a J-820 CD spectropolarimeter (JASCO) equipped with a Peltier thermo controller using a 0.5 mm quartz cuvette. Compounds **3**, **4**, **8** and **9** (0.5 mg/mL) in 0.05% TFA were heated at 85 or 95 °C for 5 min, incubated at room temperature for 10 min and stored at 4 °C overnight. The CD spectra from 260 to 190 nm of the CMP solutions were recorded at 4 °C. Temperature-dependent CD spectra measurements at 225 nm were performed from 4 to 85 °C. The obtained molar ellipticity was differentiated, and the temperature at which the maximum value was obtained was taken as the melting temperature (*T*<sub>m</sub>).

#### Kinetics of *O*-to-*N* acyl migration

Compounds **3** and **8** (1.5 mg/mL) in 0.05% TFA/H<sub>2</sub>O were incubated at 37 °C for 20 min. Phosphate buffer (100 mM; pH 7.4) was added to obtain a CMP concentration of 1.0 mg/mL. The solution was incubated at 37 °C and quenched by 0.05% TFA/H<sub>2</sub>O at the desired time points. Then, the solution was analyzed using RP-HPLC.

The conversion rate was determined from:

$$\text{conversion rate} = \frac{A_{\text{amide}}}{A_{\text{ester}} + A_{\text{amide}}} \times 100 \quad (\text{Eq.1})$$

where  $A_{\text{amide}}$  and  $A_{\text{ester}}$  represent the peak areas of the ester and amide forms, respectively. Data for initial 1 min were fitted to first-order kinetics, the reaction rate constant ( $k_1$ ) was determined from:

$$\ln[\text{ester}] = \ln[\text{ester}]_0 - k_1 t \quad (\text{Eq.2})$$

where [ester] represents the concentration of the ester form.

#### Triple helical folding analysis of the CMPs

Compound **4** (1.0 mg/mL) in 33.3 mM phosphate buffer (pH 7.4)/0.05% TFA/H<sub>2</sub>O was heated at 95 °C for 5 min, incubated at room temperature for 10 min, and stored at 4 °C overnight. The solution was incubated at 37 °C for 20 min and the CD spectra from 260 to 190 nm was measured and the  $\theta_{225}$  was defined as  $\theta_f$ . Then, the solution was incubated at 85 °C for 20 min and the CD spectra from 260 to 190 nm was measured and the  $\theta_{225}$  was defined as  $\theta_u$ . Time-dependent CD spectra measurements at 225 nm were performed at 37 °C for 2 h. Cooling from 85 to 37 °C took 2 min.

The kinetics of the triple helical folding of the CMPs were analyzed as follows<sup>3</sup>:

The fraction folded (F) was calculated from:

$$F = \frac{\theta_{\text{obs}} - \theta_u}{\theta_f - \theta_u} \quad (\text{Eq.3})$$

where  $\theta_{\text{obs}}$  represents the observed folding ellipticity and [monomer] represents the concentration of monomer determined from:

$$[\text{monomer}] = (1 - F)[\text{monomer}]_0 \quad (\text{Eq.4})$$

The data from 2 to 45 min gave a good fit to Eq.5, the triple-helical folding of CMP was a third-order reaction under these conditions.

$$\frac{1}{[\text{monomer}]^2} = \frac{1}{[\text{monomer}]_0^2} + 6k_2t \quad (\text{Eq.5})$$

#### Enzyme-linked immunosorbent assay

Type I collagen (10 µg/mL) (AteloCell I-PC, KOKEN, Tokyo, Japan) in 10 mM AcOH/H<sub>2</sub>O was heated at 95 °C for 5 min to denature. 96-Well microplates (Thermo Fisher Scientific) were coated by the heat-denatured collagen solution and blocked with 0.5% skim milk/buffer (20 mM HEPES-Na (pH 7.5), 100 mM NaCl, and 0.005% Tween-20) at room temperature for 1 h. After washing with 1 mM AcOH/H<sub>2</sub>O, compound **6** in PBS was added with or without heating at 95 °C for 5 min and chilled with ice water for 30 s. Compounds **5** and **10** in 1 mM AcOH/H<sub>2</sub>O were added to the plate and 5 µL of 10 × PBS was added.

After incubation at 37 °C for 1.5 h and washing with buffer, horseradish peroxidase (HRP)-conjugated streptavidin (1:3000 dilution in 0.5% skim milk/buffer; Thermo Fisher Scientific) was added and the mixture was incubated on ice for 30 min and washed with buffer. 2,2'-Azino-bis(3-ethylbenzothiazoline-6-sulphonic acid) diammonium salt (ABTS) (0.5 mg/mL) in phosphate-citrate buffer [0.2 M phosphate and 0.1 M citrate (pH 5.0)] containing 0.05% H<sub>2</sub>O<sub>2</sub> was added and the mixture was incubated at 37 °C for 30 min.

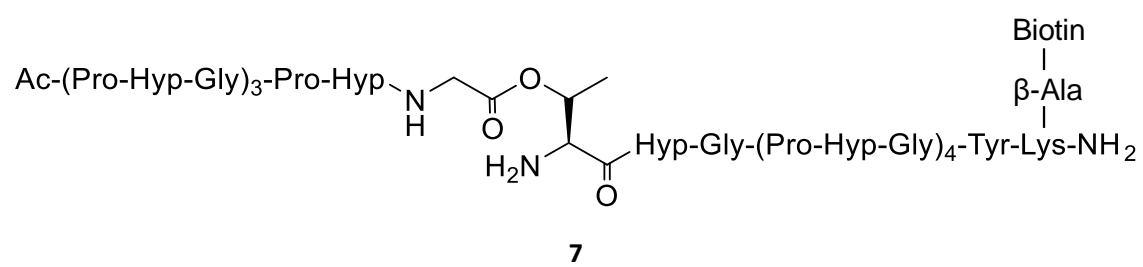

Figure S1. A structure of compound **7**.

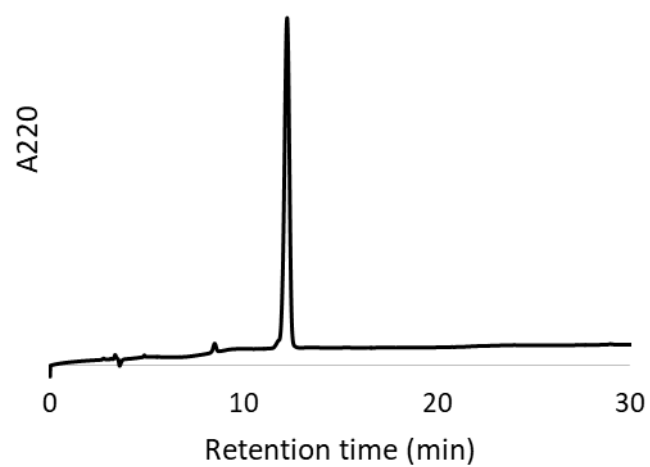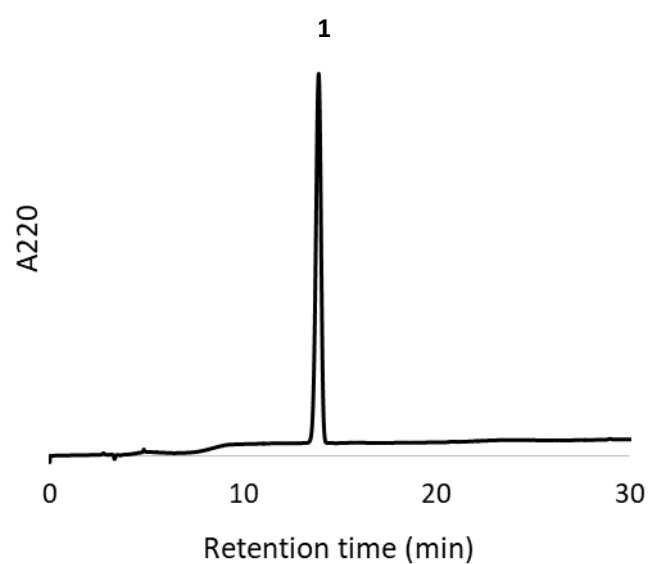

**2**

Figure S2. HPLC analysis of the purified peptides. COSMOSIL 5C<sub>18</sub>-AR-II column (size 4.6 × 250 mm), gradient 0%-20% for **1** and **2** MeCN/H<sub>2</sub>O (0.05% TFA), or 10%–30% for other peptides, 30 min at 60 °C.

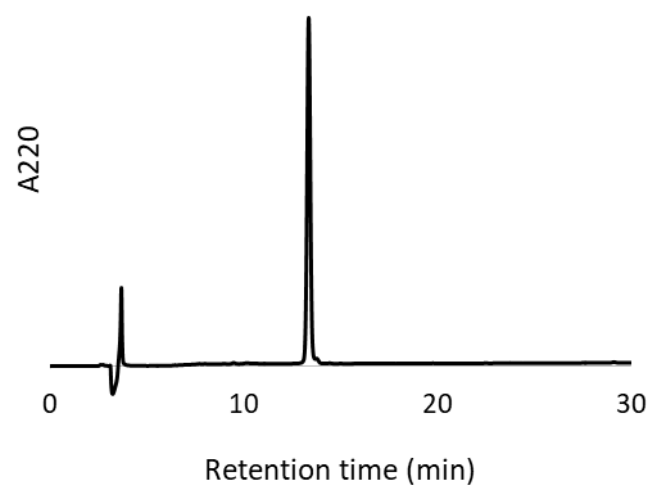

3

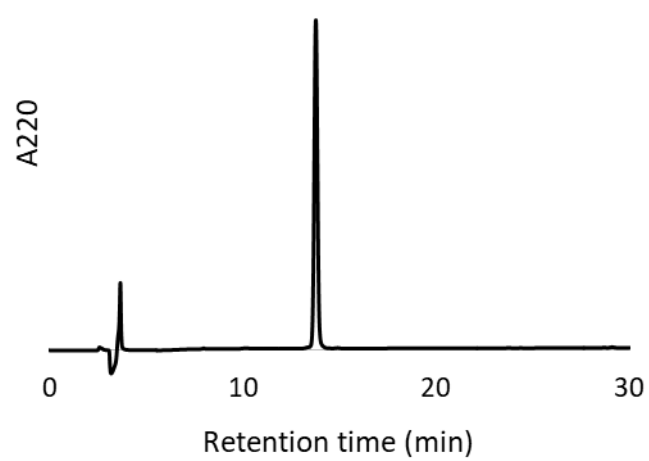

4

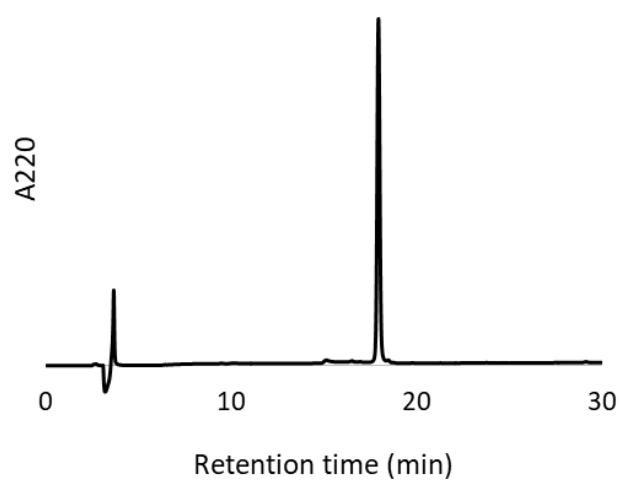

5

Figure S2. (Continued)

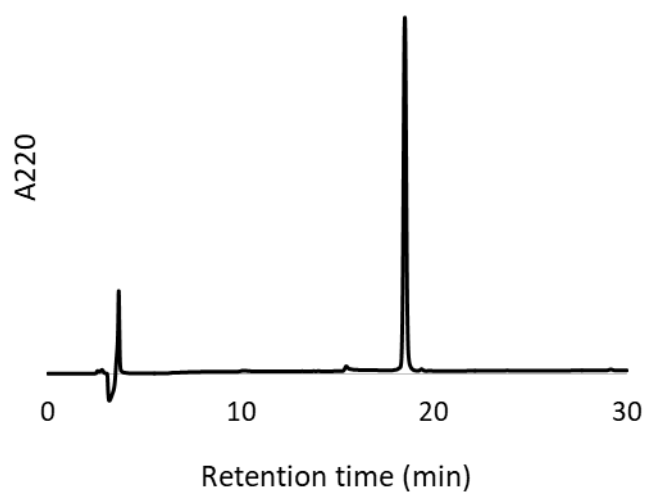

**6**

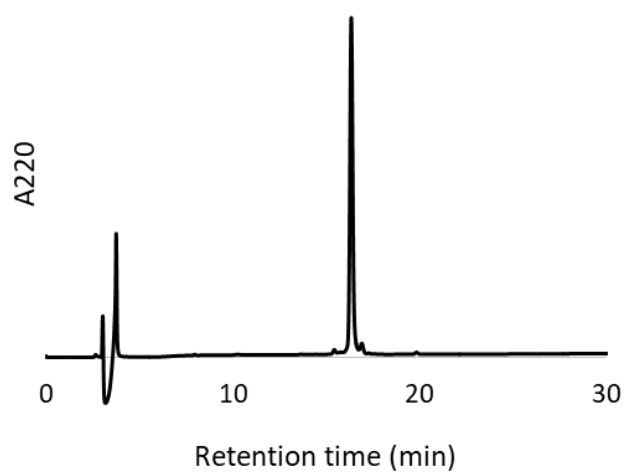

**7**

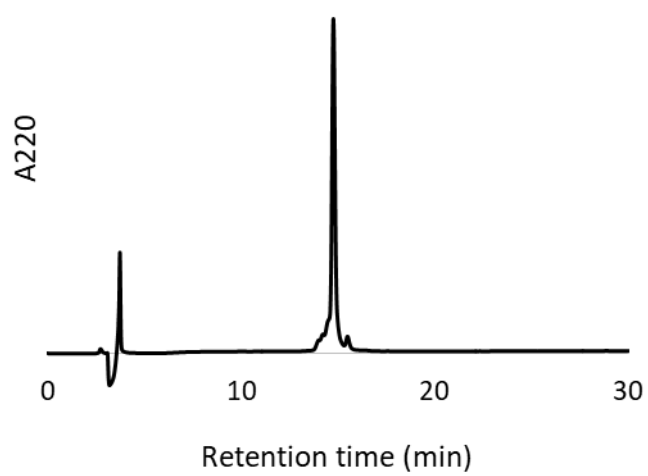

**8**

Figure S2. (Continued)



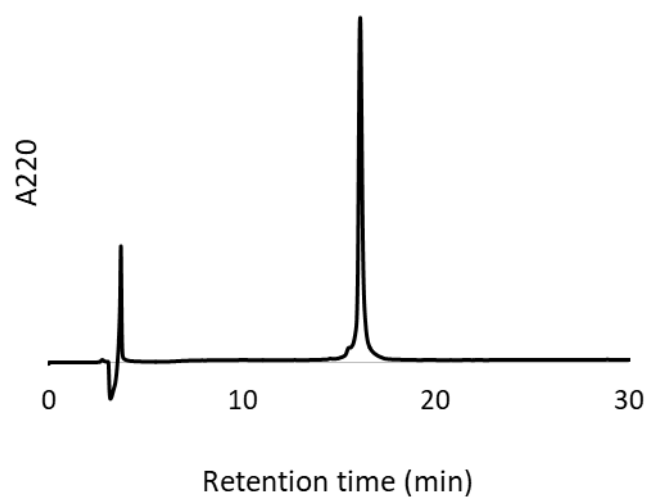

9

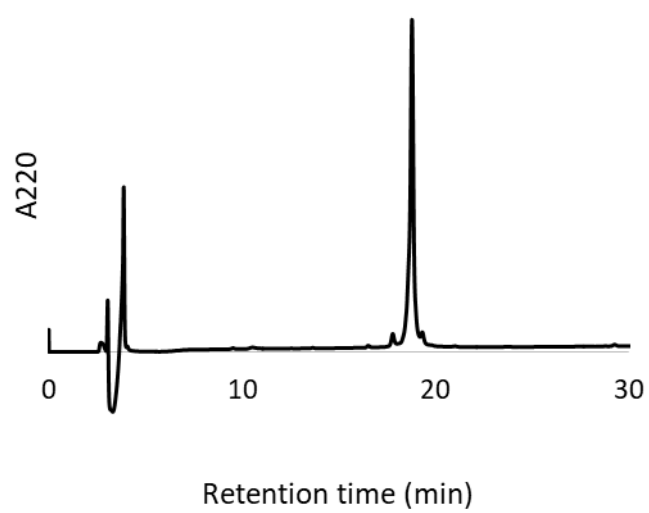

10

Figure S2. (Continued)

Table S1. HPLC retention time and analytical mass data of synthesized peptides.

| peptide   | $t_R$ (min)         | Calculated $m/z$        | Found    |
|-----------|---------------------|-------------------------|----------|
| <b>1</b>  | 12.3 <sup>[a]</sup> | 584.267 <sup>[c]</sup>  | 584.272  |
| <b>2</b>  | 13.9 <sup>[a]</sup> | 584.267 <sup>[c]</sup>  | 584.273  |
| <b>3</b>  | 13.4 <sup>[b]</sup> | 873.065 <sup>[d]</sup>  | 873.068  |
| <b>4</b>  | 13.8 <sup>[b]</sup> | 873.065 <sup>[d]</sup>  | 873.068  |
| <b>5</b>  | 18.0 <sup>[b]</sup> | 1040.481 <sup>[d]</sup> | 1040.482 |
| <b>6</b>  | 18.5 <sup>[b]</sup> | 1040.481 <sup>[d]</sup> | 1040.482 |
| <b>7</b>  | 16.3 <sup>[b]</sup> | 1019.474 <sup>[d]</sup> | 1019.478 |
| <b>8</b>  | 14.8 <sup>[b]</sup> | 1245.559 <sup>[e]</sup> | 1245.561 |
| <b>9</b>  | 16.1 <sup>[b]</sup> | 1245.559 <sup>[e]</sup> | 1245.559 |
| <b>10</b> | 18.8 <sup>[b]</sup> | 1381.623 <sup>[e]</sup> | 1381.622 |

HPLC conditions: COSMOSIL 5C<sub>18</sub>-AR-II column (size 4.6 × 250 mm), 60 °C, 1 mL/min, gradient <sup>[a]</sup>0-20% or <sup>[b]</sup>10-30% MeCN/H<sub>2</sub>O (0.05% TFA) over 30 min.

<sup>[c]</sup>[M+H]<sup>+</sup>, <sup>[d]</sup>[M+3H]<sup>3+</sup>, <sup>[e]</sup>[M+4H]<sup>4+</sup>.

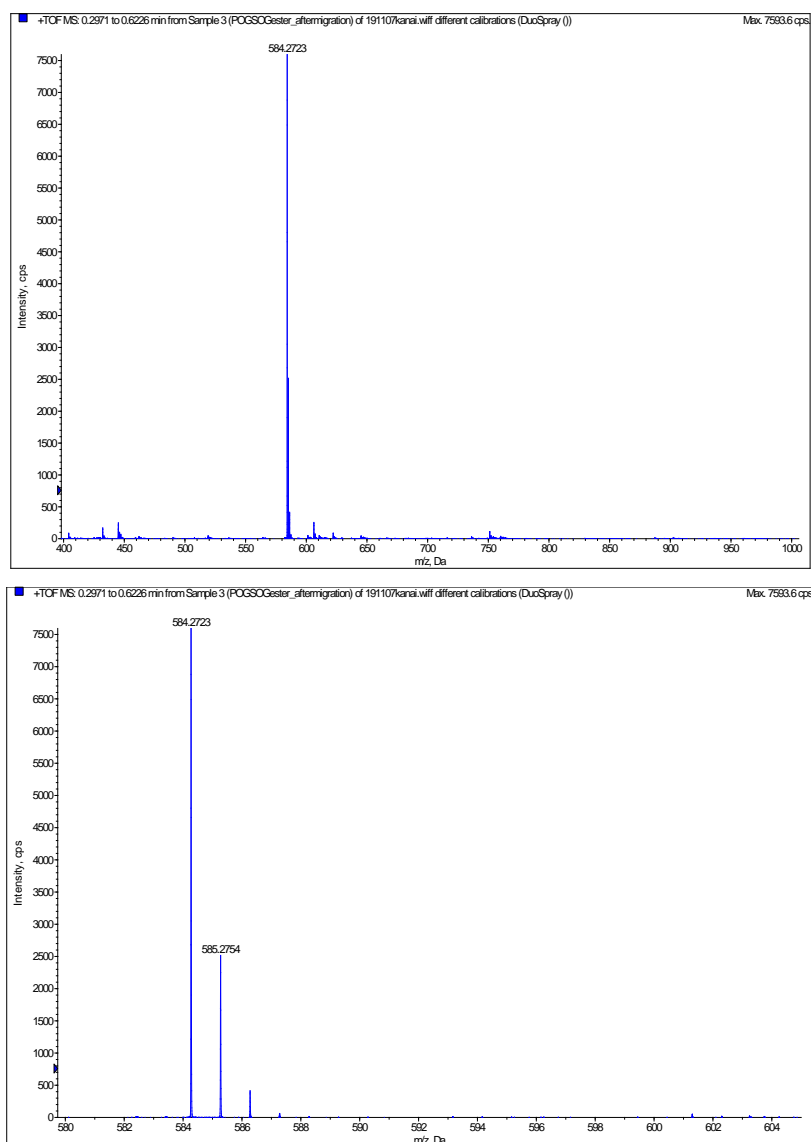

Figure S3. ESI-MS analysis of a converted compound of **1** in 0.1 M phosphate buffer (pH 7.4). The found  $m/z$  (584.272) corresponded with the calculated one of **2** ( $[M+H]^+$ : 584.267).

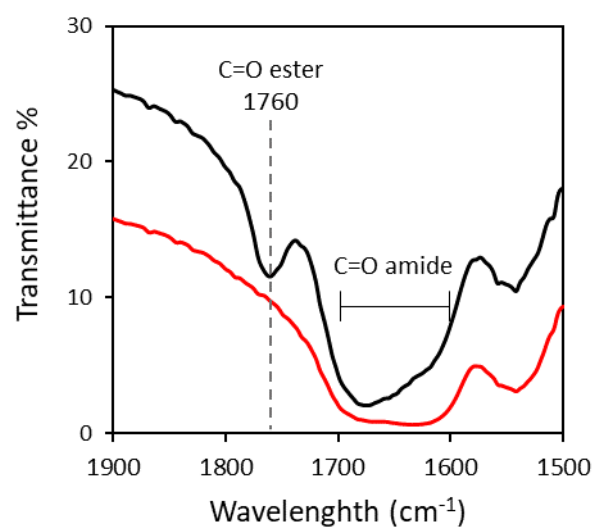

Figure S4. FT-IR spectra of **1** (black) and **2** (red).

Table S2.  $^1\text{H}$  and  $^{13}\text{C}$  NMR spectral data for **1** (methanol- $d_4$ ).

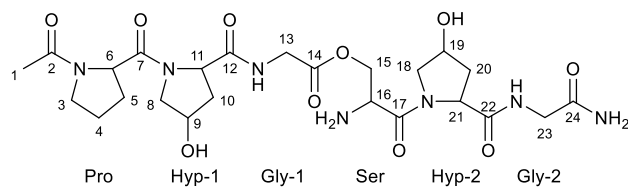

| <b>1</b> |          |                     |                     |
|----------|----------|---------------------|---------------------|
| Residue  | position | $\delta_{\text{H}}$ | $\delta_{\text{C}}$ |
| Ac       | 1        | 2.09                | 22.3                |
|          | 2        |                     | 172.2               |
| Pro      | 3        | 3.63                | 49.5                |
|          | 4        | 2.07                | 25.8                |
|          |          | 1.97                |                     |
|          | 5        | 2.27                | 29.8                |
|          |          | 2.03                |                     |
|          | 6        | 4.65                | 59.9                |
| Hyp-1    | 7        |                     | 173.4               |
|          | 8        | 3.76                | 56.5                |
|          | 9        | 4.50                | 71.1                |
|          | 10       | 2.24                | 39.0                |
|          |          | 2.07                |                     |
|          | 11       | 4.56                | 60.7                |
| Gly-1    | 12       |                     | 175.2               |
|          | 13       | 4.06                | 42.2                |
|          |          | 3.98                |                     |
|          | 14       |                     | 170.5               |
| Ser      | 15       | 4.62                | 62.5                |
|          |          | 4.41                |                     |
|          | 16       | 4.61                | 53.2                |
|          | 17       |                     | 166.4               |
| Hyp-2    | 18       | 3.82                | 57.0                |
|          |          | 3.73                |                     |
|          | 19       | 4.56                | 71.1                |
|          | 20       | 2.29                | 39.0                |
|          |          | 2.10                |                     |
| Gly-2    | 21       | 4.59                | 61.4                |
|          | 22       |                     | 174.2               |
|          | 23       | 3.74                | 43.4                |
|          |          | 3.95                |                     |
|          | 24       |                     | 174.4               |

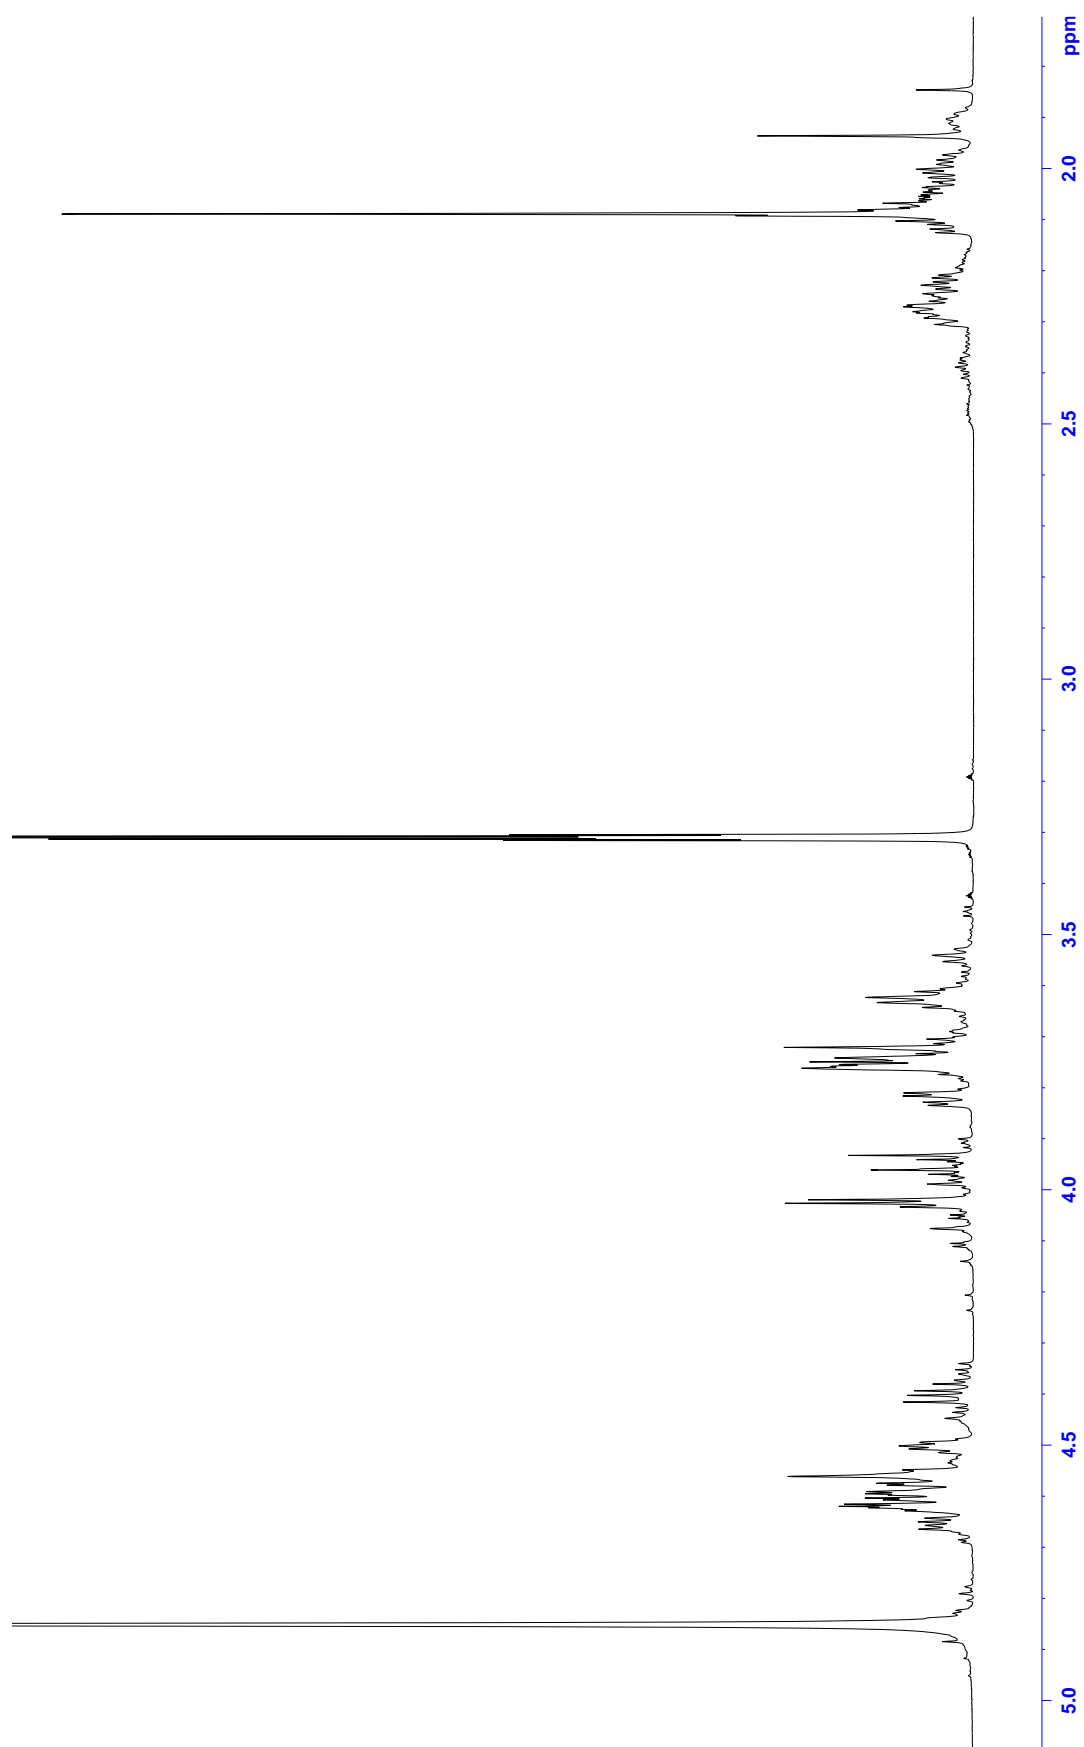

Figure S5.  $^1\text{H}$  NMR spectrum of **1** (600 MHz, methanol- $d_4$ ).

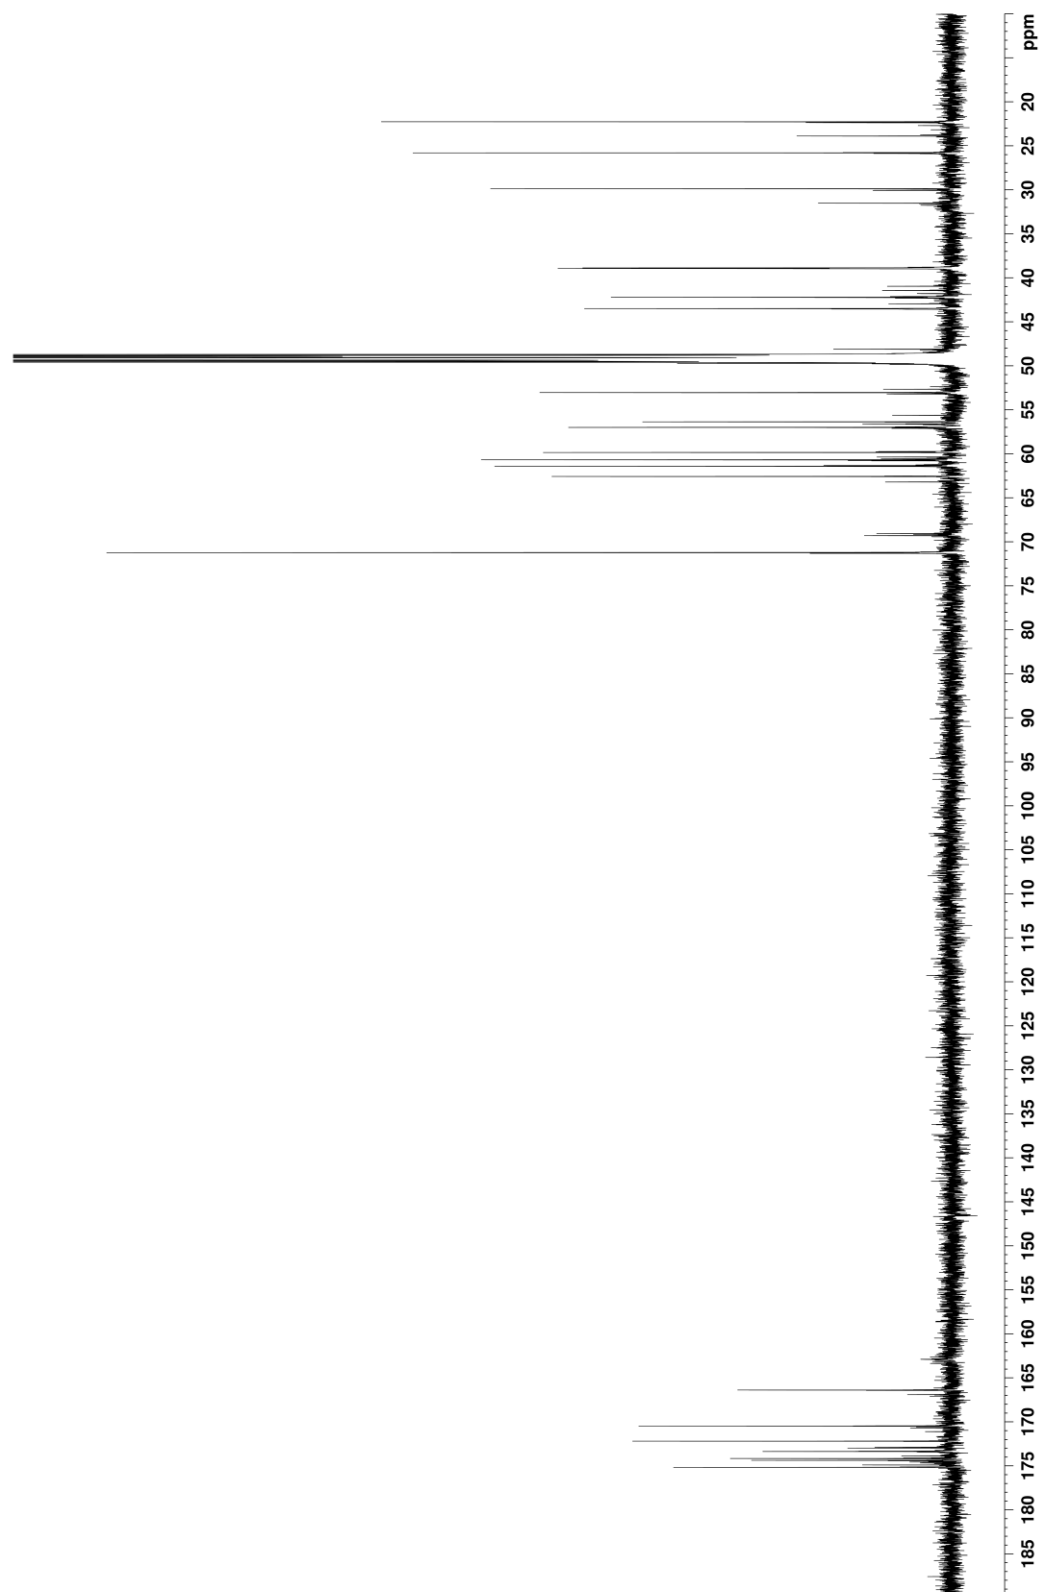

Figure S6.  $^{13}\text{C}$  NMR spectrum of **1** (150 MHz,  $\text{methanol-}d_4$ ).

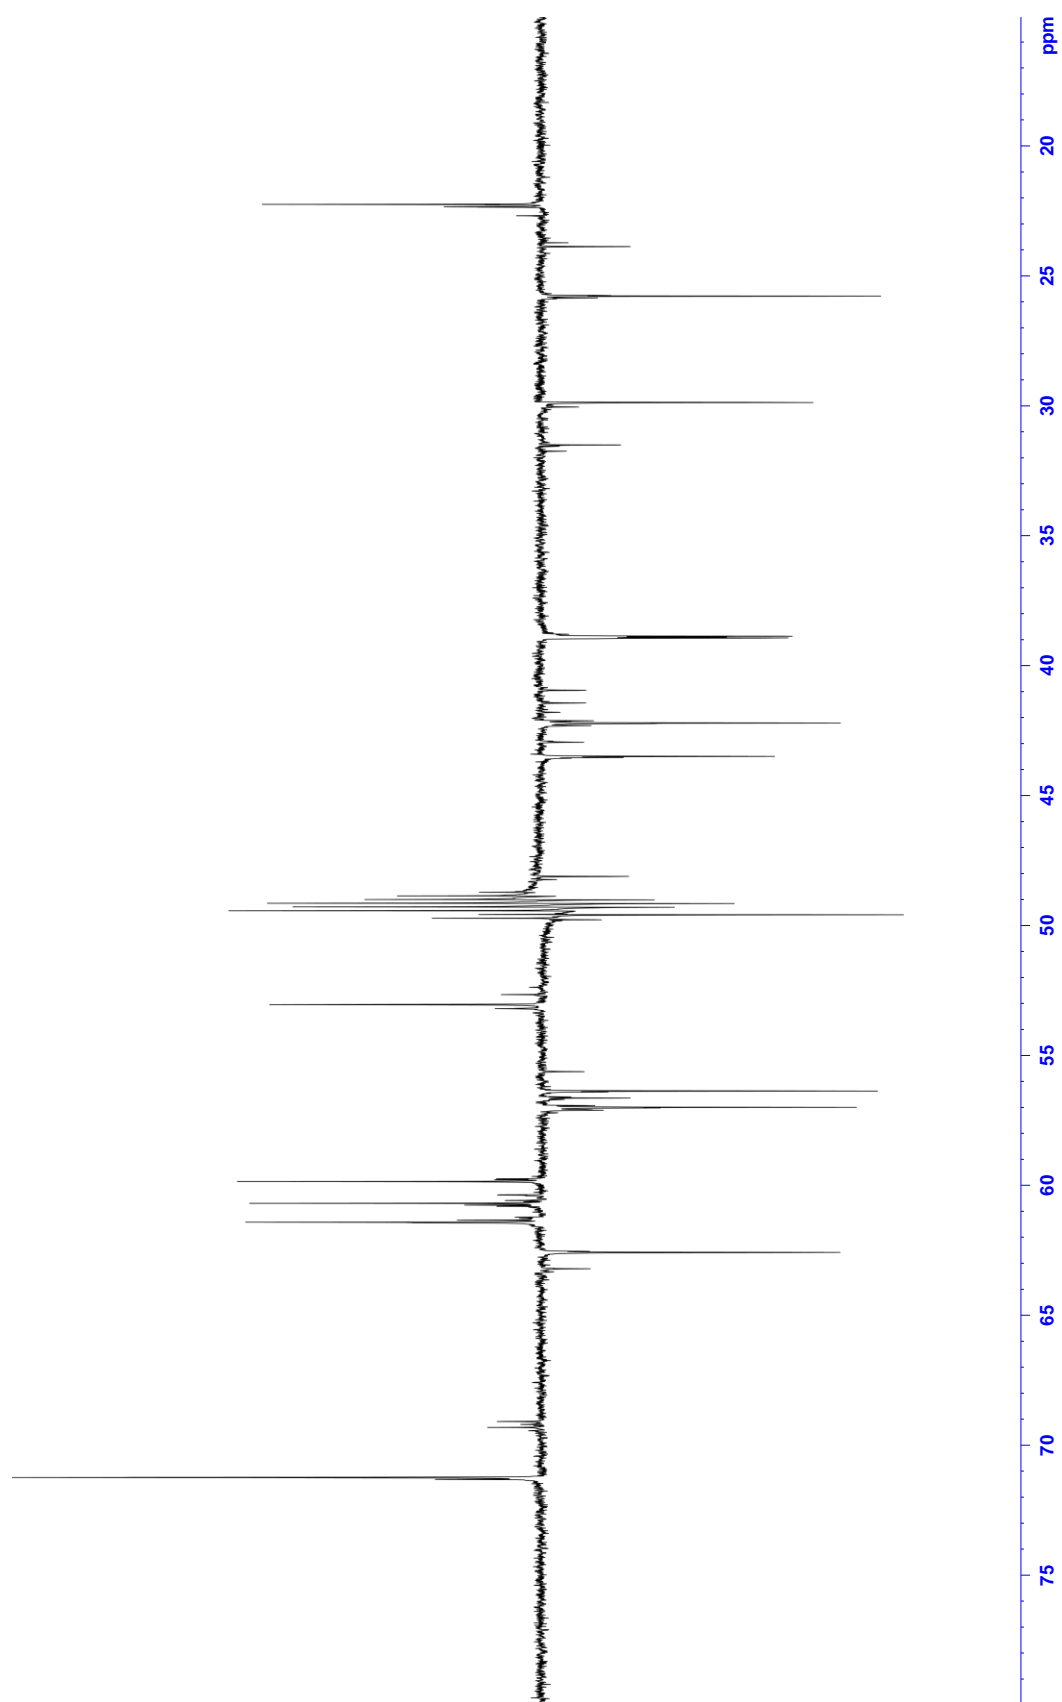

Figure S7. DEPT-135 spectrum of **1** (150 MHz, methanol- $d_4$ ).



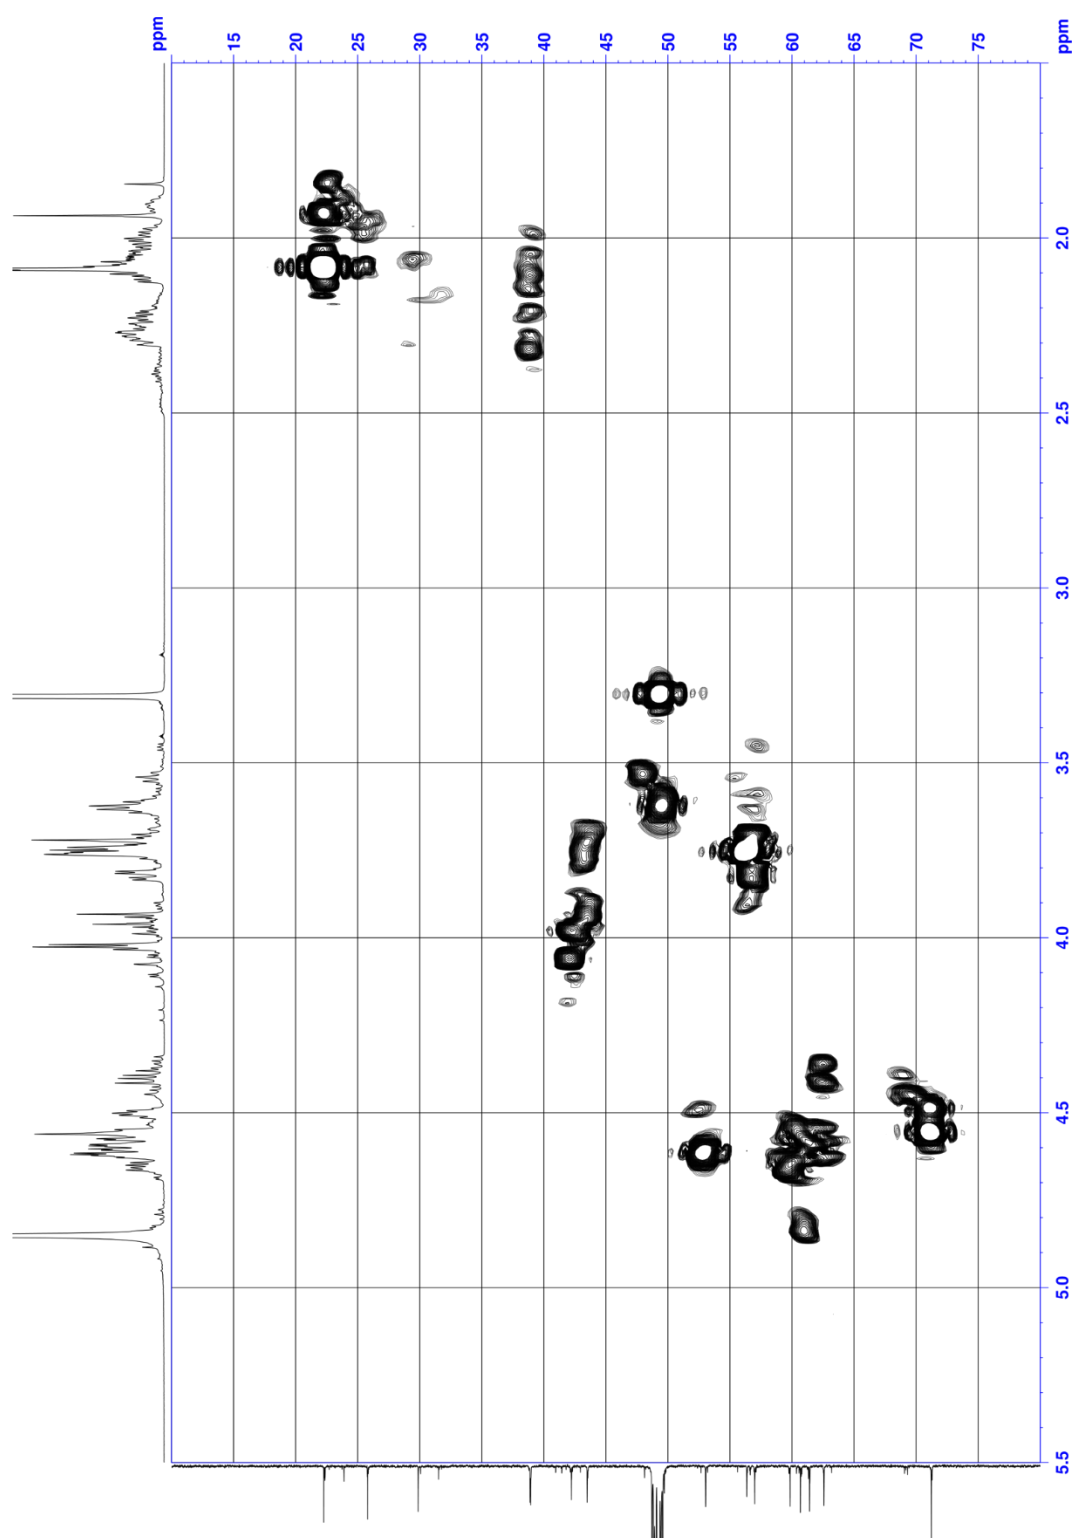

Figure S8. HMQC spectrum of **1** (600 MHz, methanol- $d_4$ ).

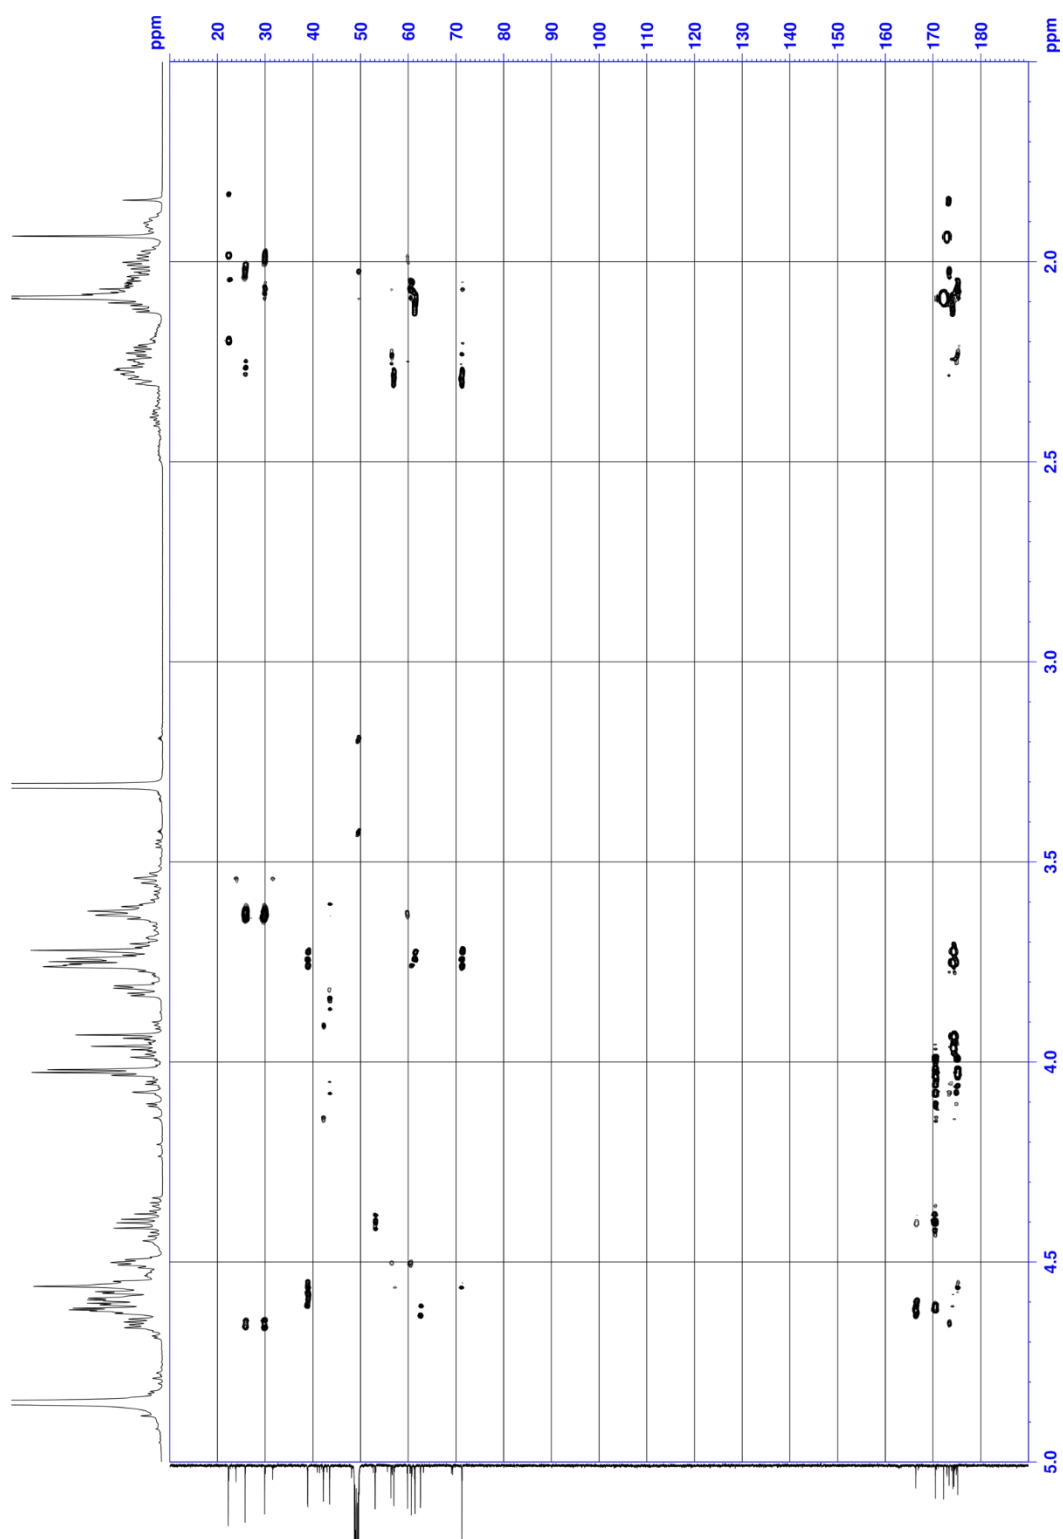

Figure S9. HMBC spectrum of **1** (600 MHz, methanol- $d_4$ ).

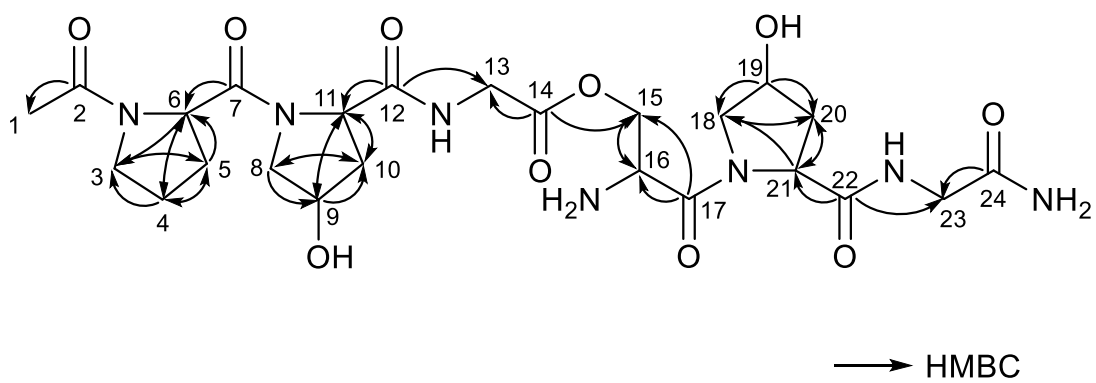

Figure S10. HMBC correlations for **1**.

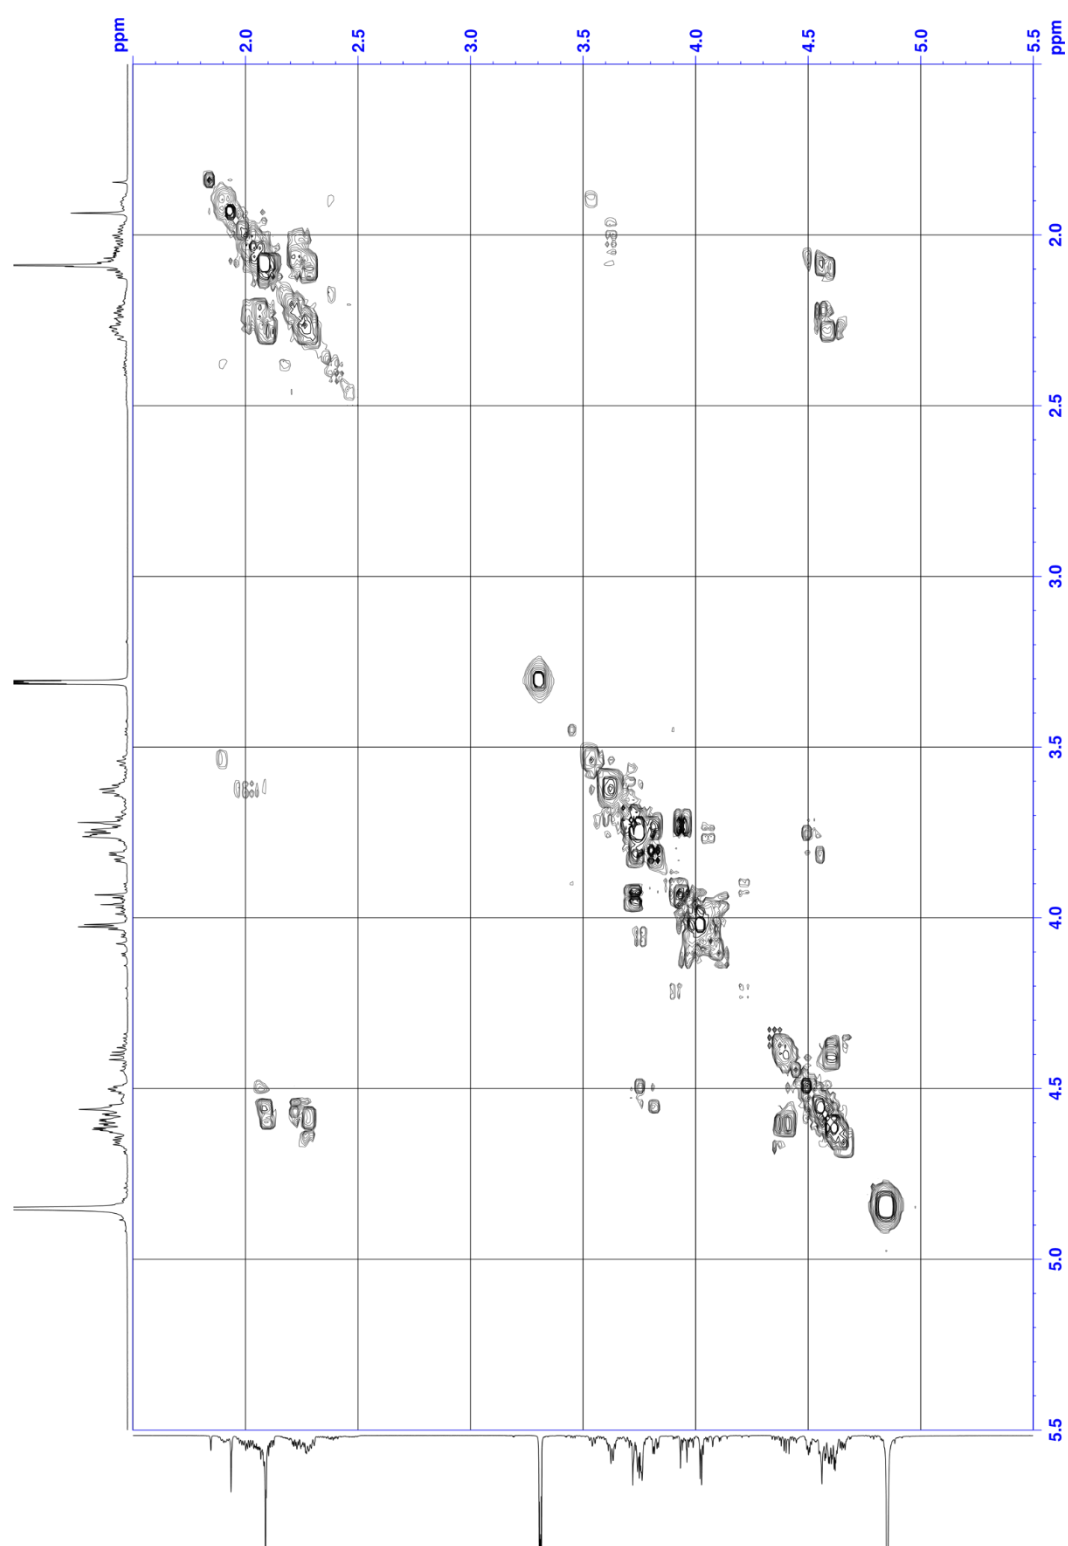

Figure S11. COSY spectrum of **1** (600 MHz, methanol- $d_4$ ).

Table S3.  $^1\text{H}$  and  $^{13}\text{C}$  NMR spectral data for **2** (methanol- $d_4$ ).

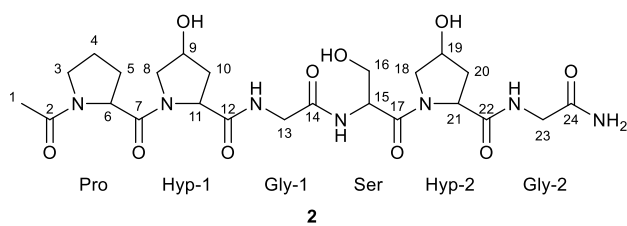

| Residue | position | $\delta_{\text{H}}$ | $\delta_{\text{C}}$ |
|---------|----------|---------------------|---------------------|
| Ac      | 1        | 2.07                | 22.1                |
|         | 2        |                     | 172.4               |
| Pro     | 3        | 3.67                | 49.5                |
|         |          | 3.59                |                     |
|         | 4        | 2.07                | 25.8                |
|         |          | 1.95                |                     |
|         | 5        | 2.27                | 29.7                |
|         |          | 2.00                |                     |
|         | 6        | 4.65                | 59.8                |
| Hyp-1*  | 7        |                     | 173.2               |
|         | 8        | 3.86                | 57.0                |
|         | 9        | 4.56                | 71.3                |
|         | 10       | 2.24                | 38.8                |
|         |          | 2.04                |                     |
| Gly-1   | 11       | 4.57                | 61.2                |
|         | 12       |                     | 174.9               |
|         | 13       | 4.10                | 43.6                |
| Ser     |          | 3.65                |                     |
|         | 14       |                     | 171.8               |
|         | 15       | 4.74                | 55.9                |
|         | 16       | 3.82                | 63.0                |
|         | 17       |                     | 172.1               |
| Hyp-2*  | 18       | 3.78                | 56.7                |
|         | 19       | 4.56                | 71.5                |
|         | 20       | 2.24                | 38.8                |
|         |          | 2.04                |                     |
|         | 21       | 4.57                | 61.1                |
| Gly-2   | 22       |                     | 175.0               |
|         | 23       | 3.85                | 43.5                |
|         |          | 3.75                |                     |
|         | 24       |                     | 174.6               |

\*interconvertible

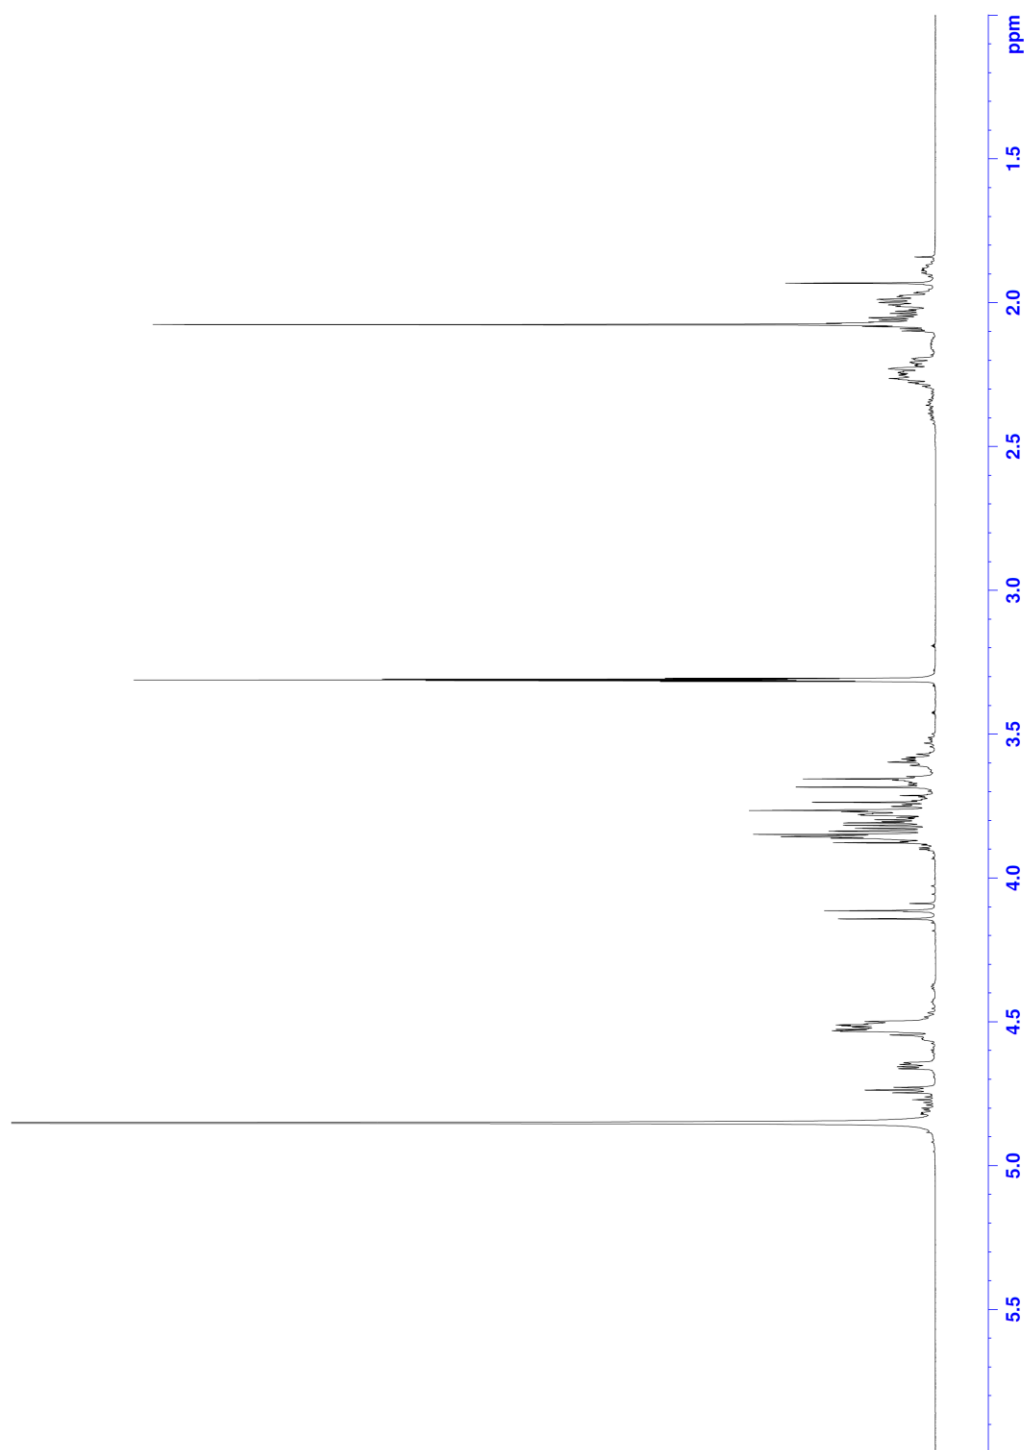

Figure S12.  $^1\text{H}$  NMR spectrum of **2** (600 MHz,  $\text{methanol-}d_4$ ).

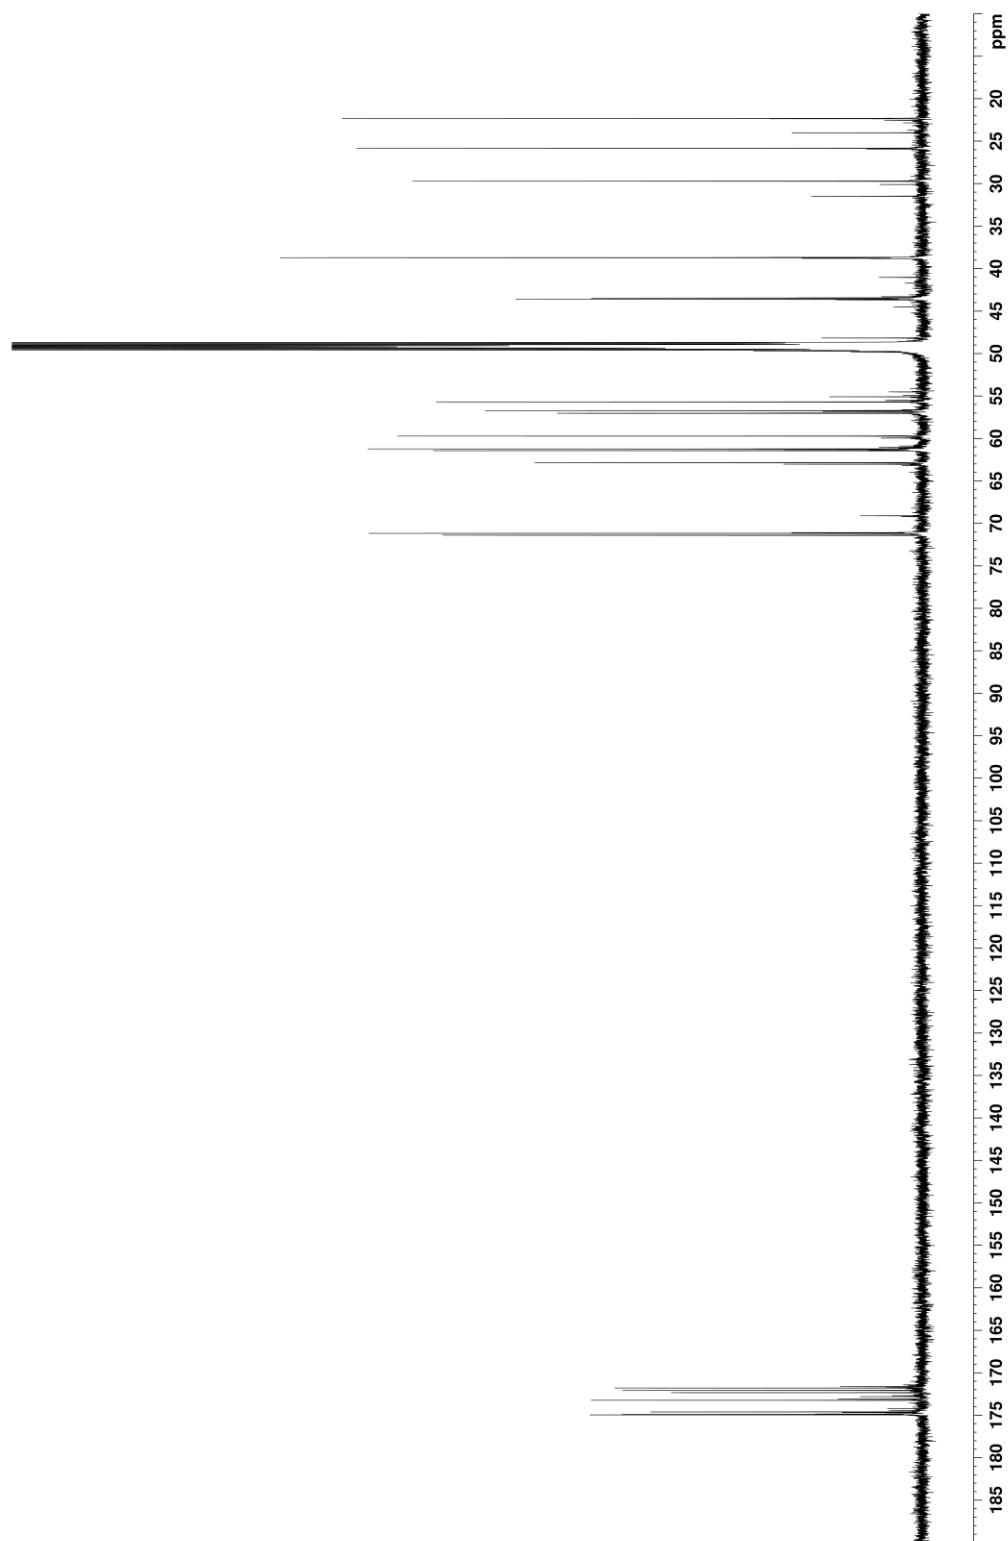

Figure S13.  $^{13}\text{C}$  NMR spectrum of **2** (150 MHz,  $\text{methanol-}d_4$ ).

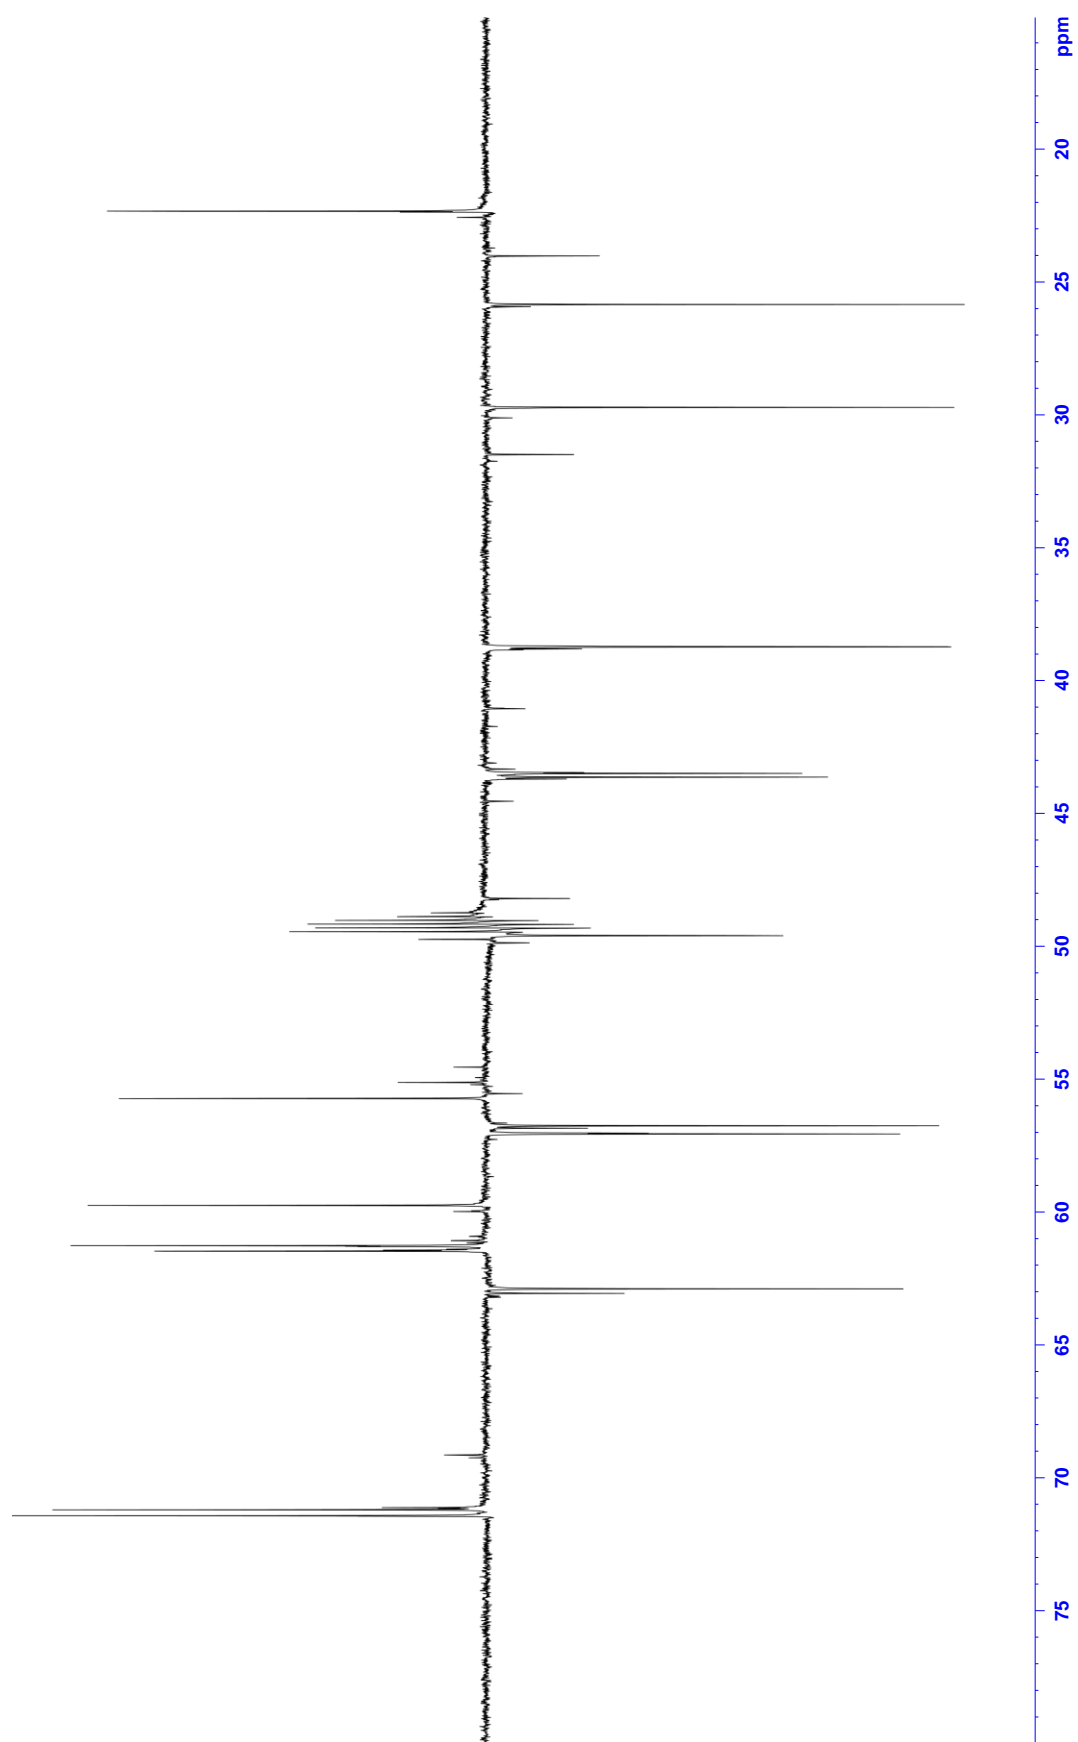

Figure S14. DEPT-135 spectrum of **2** (150 MHz, methanol- $d_4$ ).



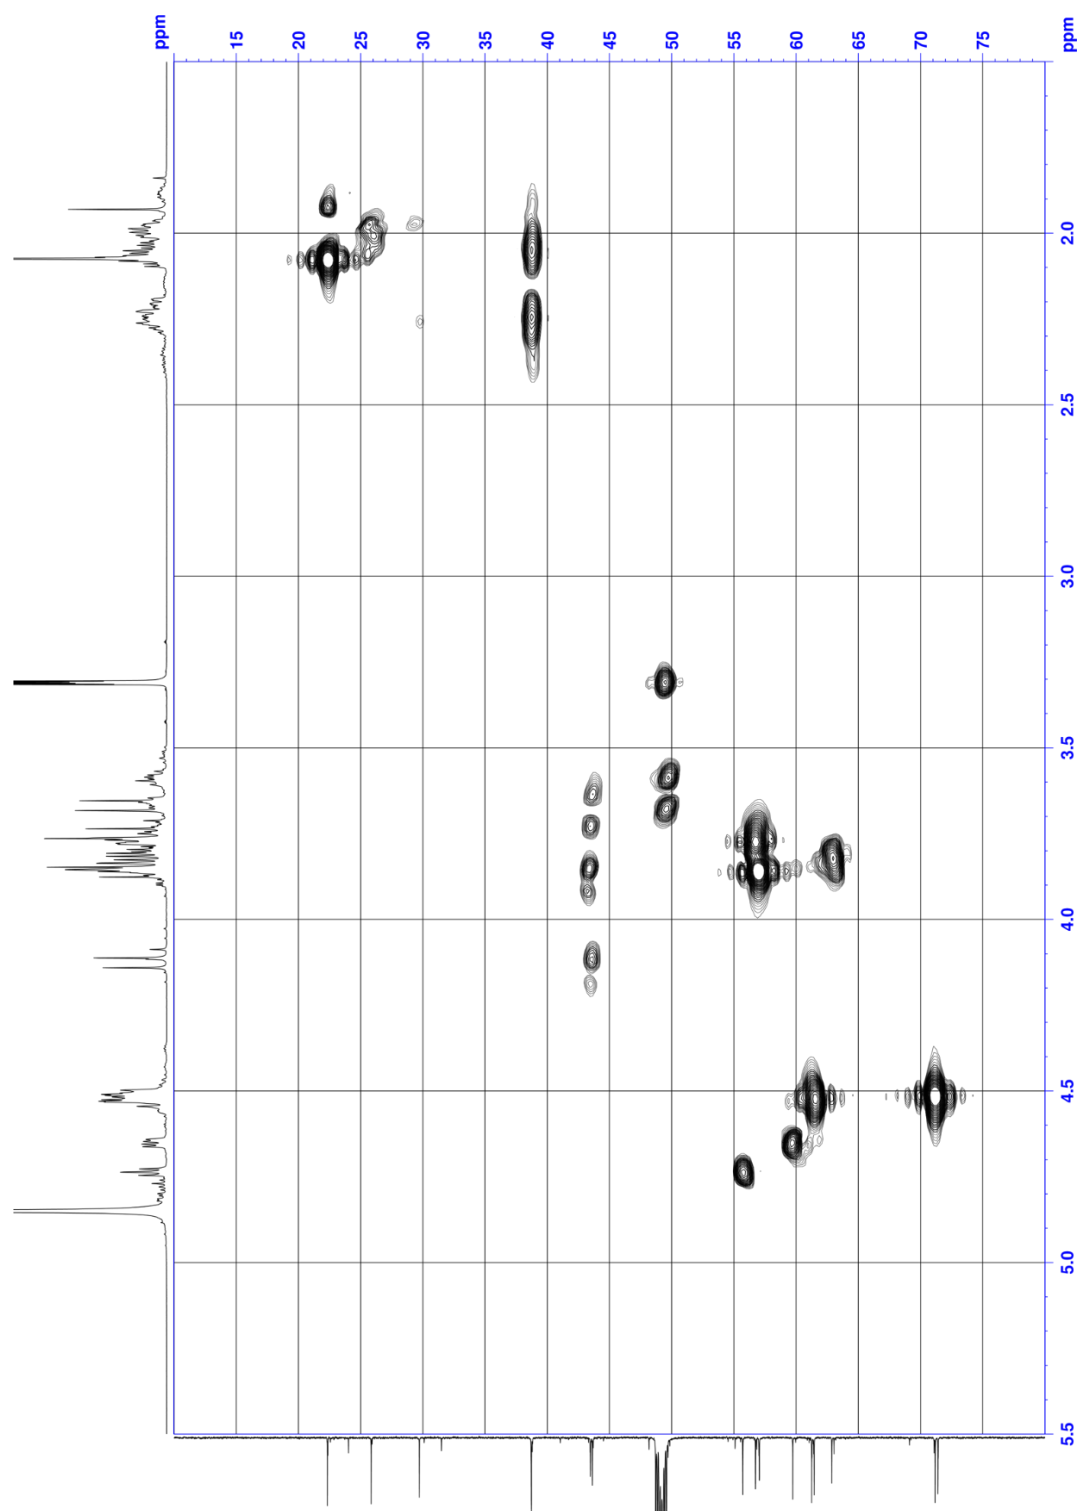

Figure S15. HMQC spectrum of **2** (600 MHz, methanol- $d_4$ ).

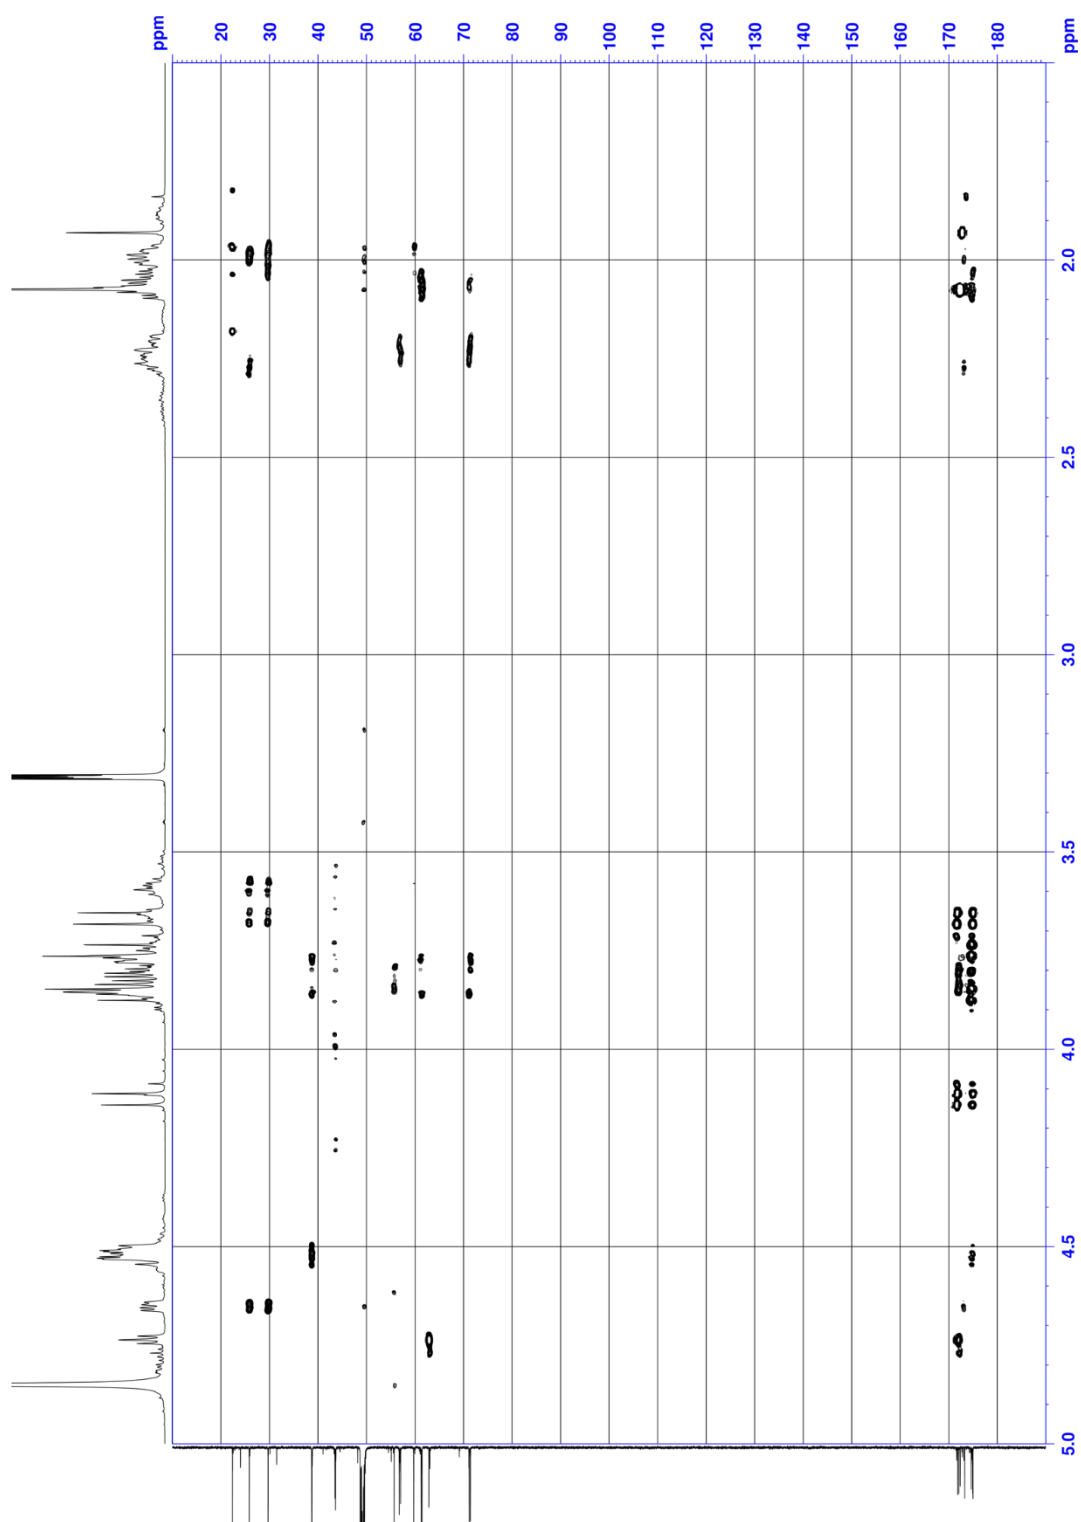

Figure S16. HMBC spectrum of **2** (600 MHz, methanol- $d_4$ ).

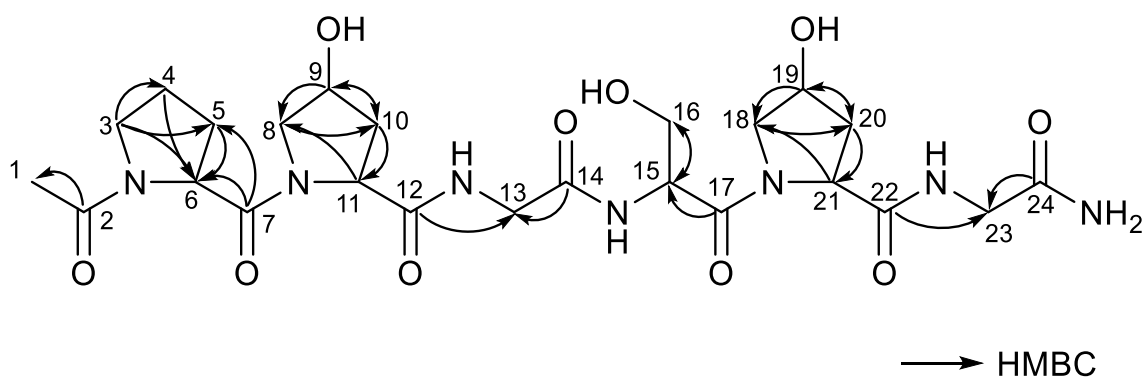

Figure S17. HMBC correlations for **2**.

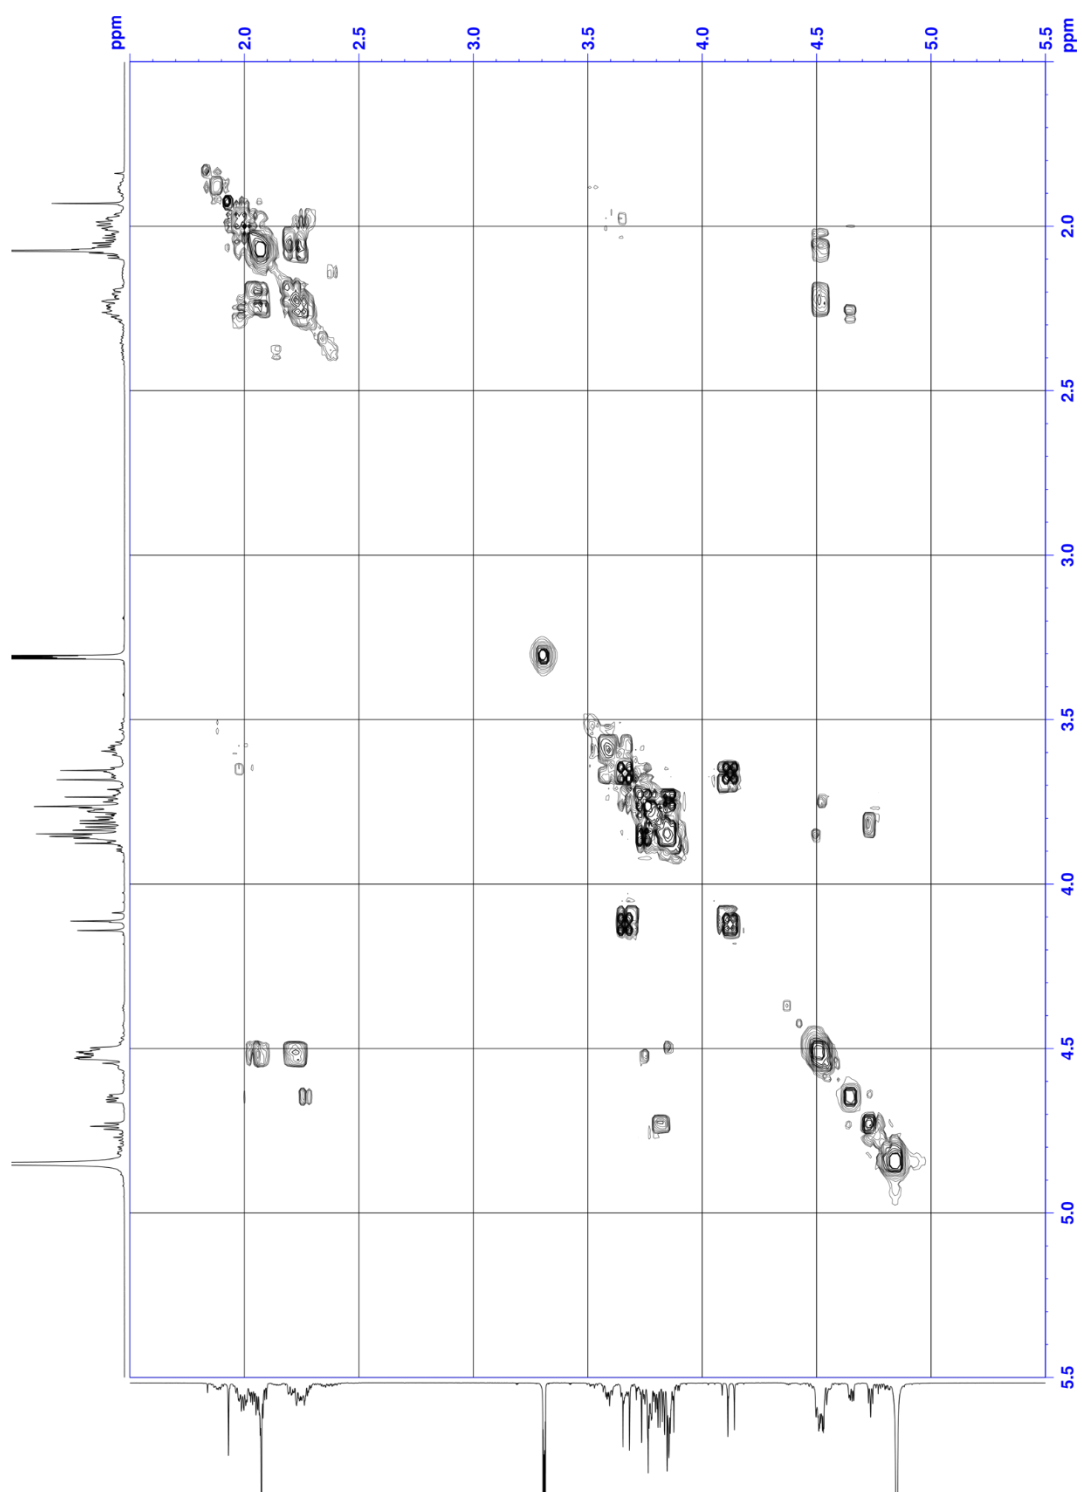

Figure S18. COSY spectrum of **2** (600 MHz, methanol- $d_4$ ).

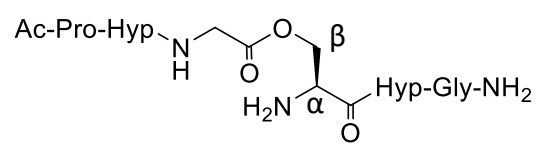

1

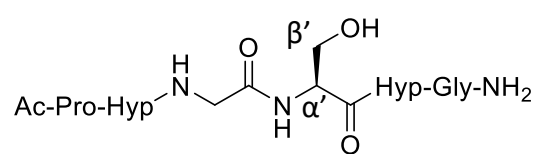

2

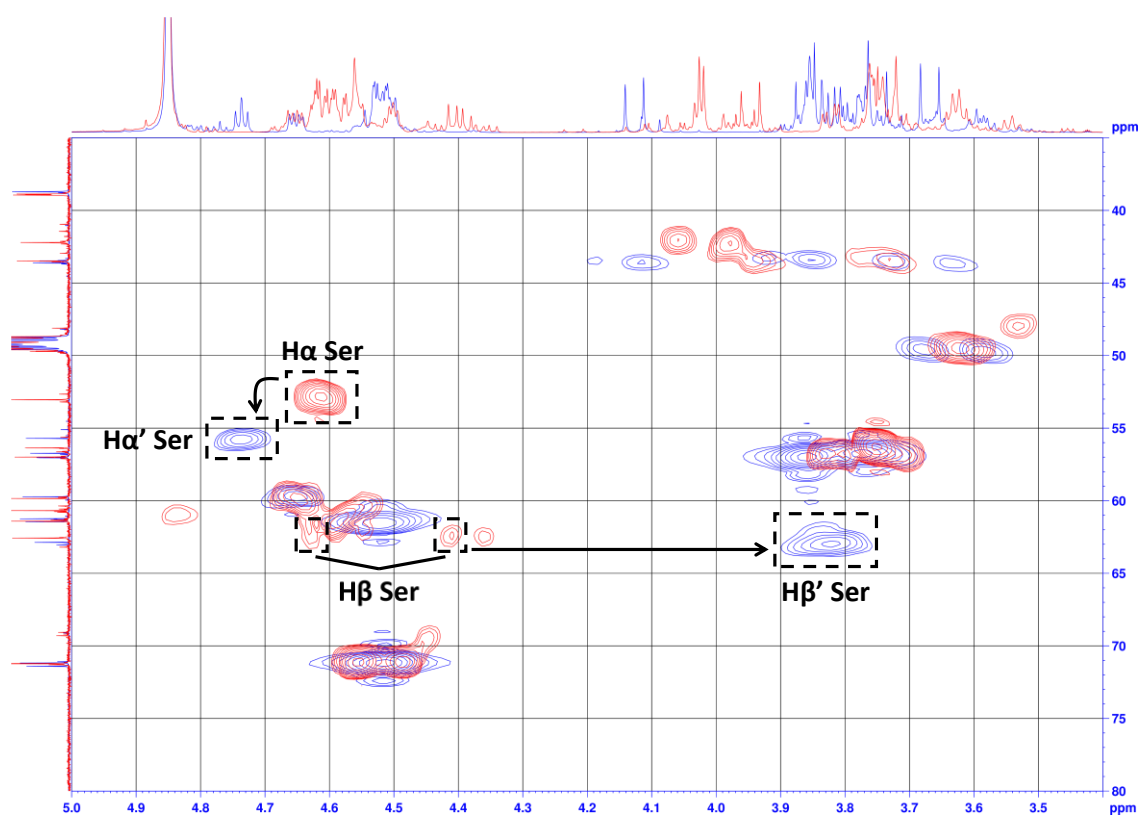

Figure S19. <sup>1</sup>H-<sup>13</sup>C HMQC spectra of **1** (red) and **2** (blue) (600 MHz, methanol-*d*<sub>4</sub>).

(a)

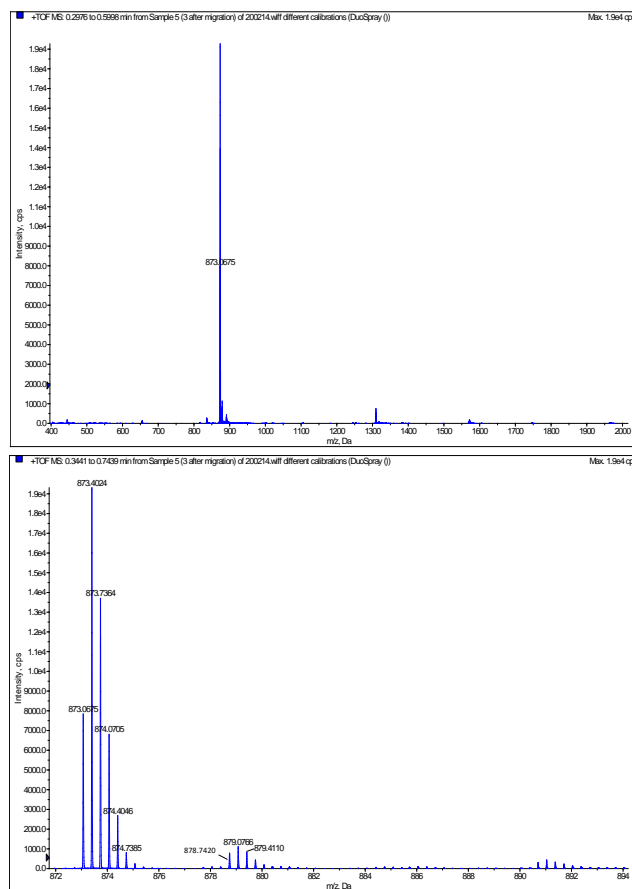

(b)

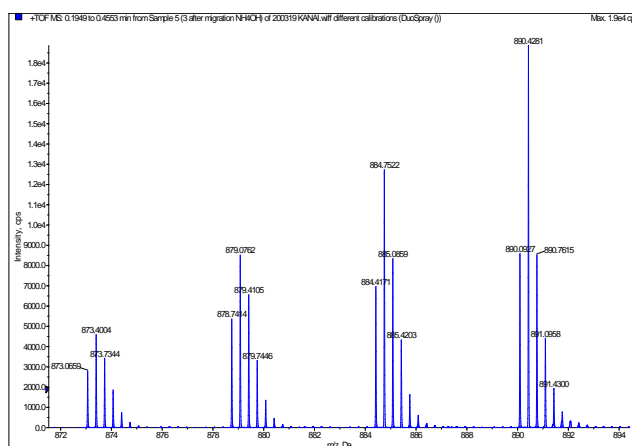

Figure S20. (a) ESI-MS analysis of a converted compound of **3** in PBS. The found  $m/z$  (873.068 and 878.742) corresponded with the calculated one of **4** ( $[M+3H]^{3+}$ : 873.065 and  $[M+2H+NH_4]^{3+}$ : 878.741). (b) ESI-MS analysis of the converted compound of **3** containing 0.005% aqueous ammonia. The found  $m/z$  (873.066, 878.741, 884.417 and 890.093) corresponded with the calculated ones of **4** ( $[M+3H]^{3+}$ : 873.065,  $[M+2H+NH_4]^{3+}$ : 878.741,  $[M+H+2NH_4]^{3+}$ : 884.416,  $[M+3NH_4]^{3+}$ : 890.092). Since the relative signal intensity of a minor peak of (a) increased in the presence of  $NH_4OH$ , the presence of a  $NH_4^+$  adduct was indicated.

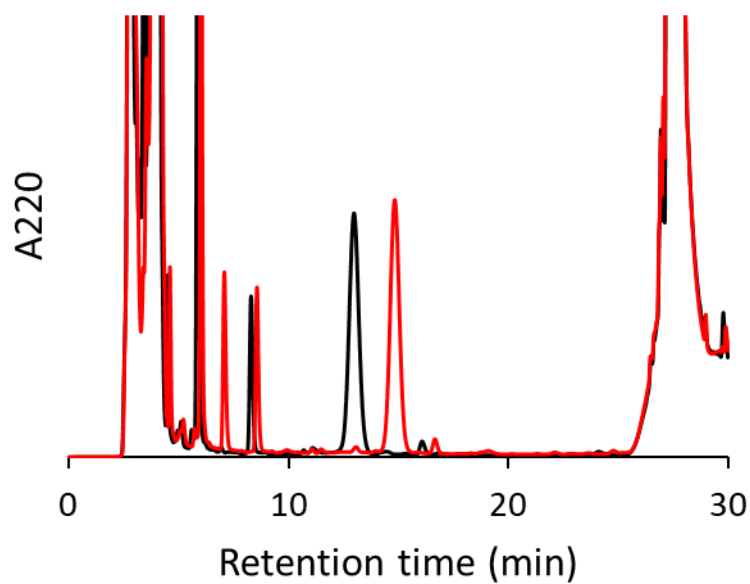

Figure S21. HPLC analysis of the *O*-to-*N* acyl migration of compound **3** in FBS for 0 (black) and 5 (red) min. COSMOSIL 5C<sub>18</sub>-AR-II column (size 4.6 × 250 mm) at 60 °C, gradient 12%–14% MeCN/H<sub>2</sub>O (0.05% TFA) (0–20 min), 14%–90% (20–25 min) and 90% (25–30 min).

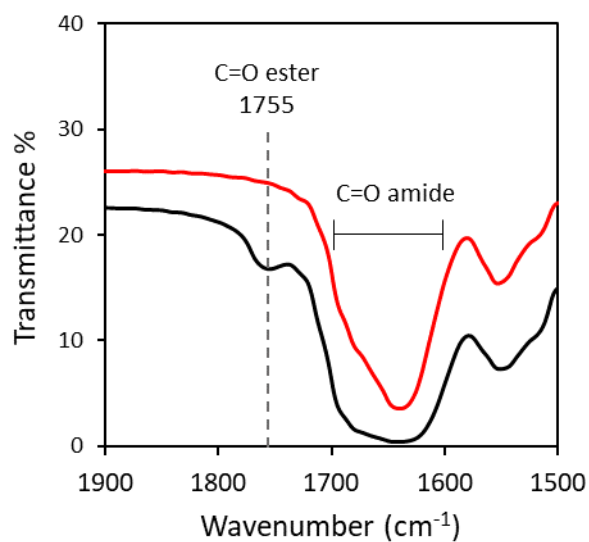

Figure S22. FT-IR spectra of **3** (black) and **4** (red).

(a)

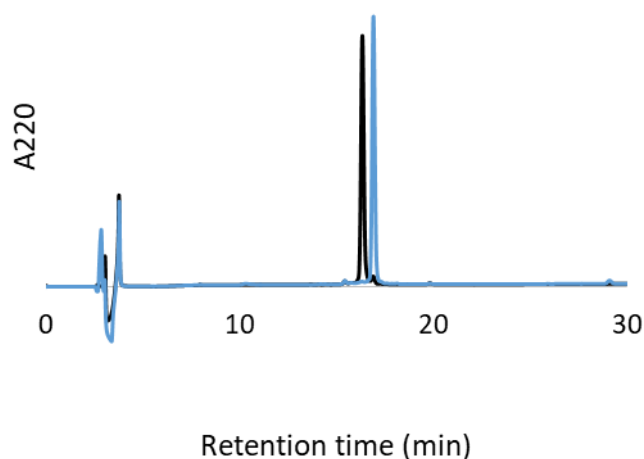

(b)

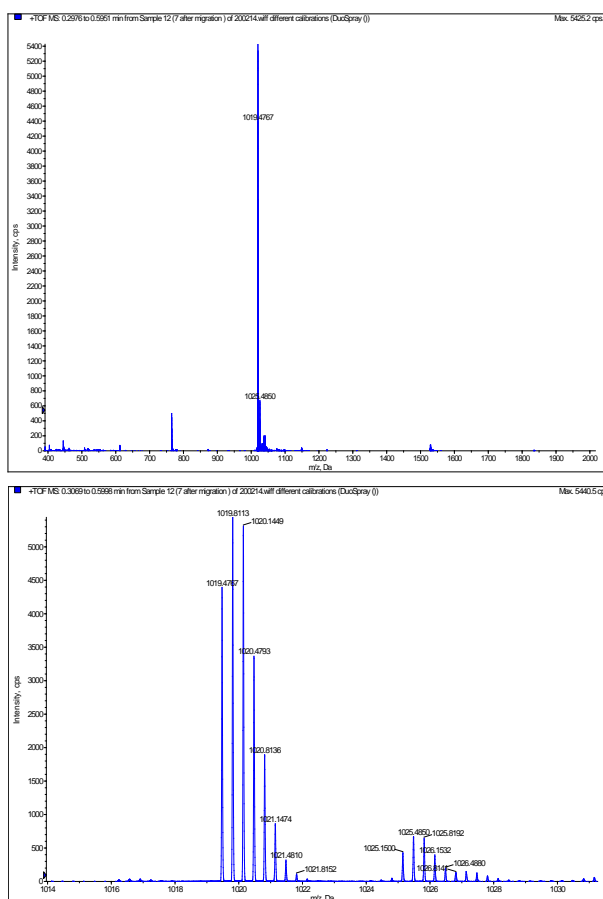

Figure S23. (a) HPLC analysis of the *O*-to-*N* acyl migration of compound **7** in 0.05% TFA/H<sub>2</sub>O (black) and in PBS for 10 min (blue). COSMOSIL 5C<sub>18</sub>-AR-II column (size 4.6 × 250 mm), gradient 10%–30% MeCN/H<sub>2</sub>O (0.05% TFA), 30 min at 60 °C. (b) ESI-MS analysis of a converted compound of **7** in PBS. The retention time of HPLC was different from **7** in 0.05% TFA/H<sub>2</sub>O and the found *m/z* (1019.477 and 1025.150) corresponded with the calculated ones of the converted compound ([*M*+3*H*]<sup>3+</sup>: 1019.474 and [*M*+2*H*+NH<sub>4</sub>]<sup>3+</sup>: 1025.149).



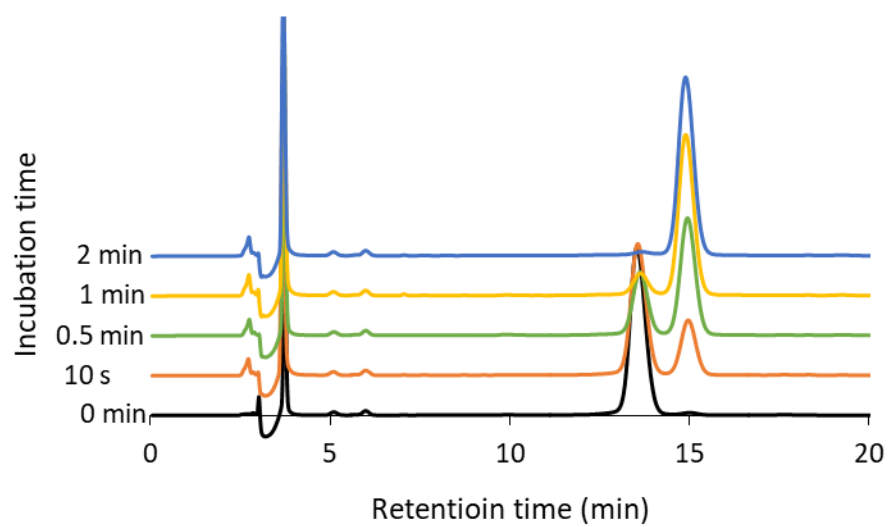

Figure S24. Kinetics of the *O*-to-*N* acyl migration of compound **3** monitored by RP-HPLC. COSMOSIL 5C<sub>18</sub>-AR-II column (size 4.6 × 250 mm), gradient 12%–14% MeCN/H<sub>2</sub>O (0.05% TFA), 20 min at 60 °C.

(a)

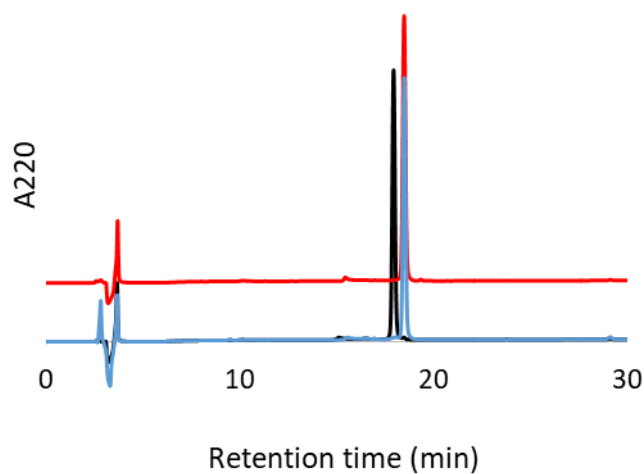

(b)

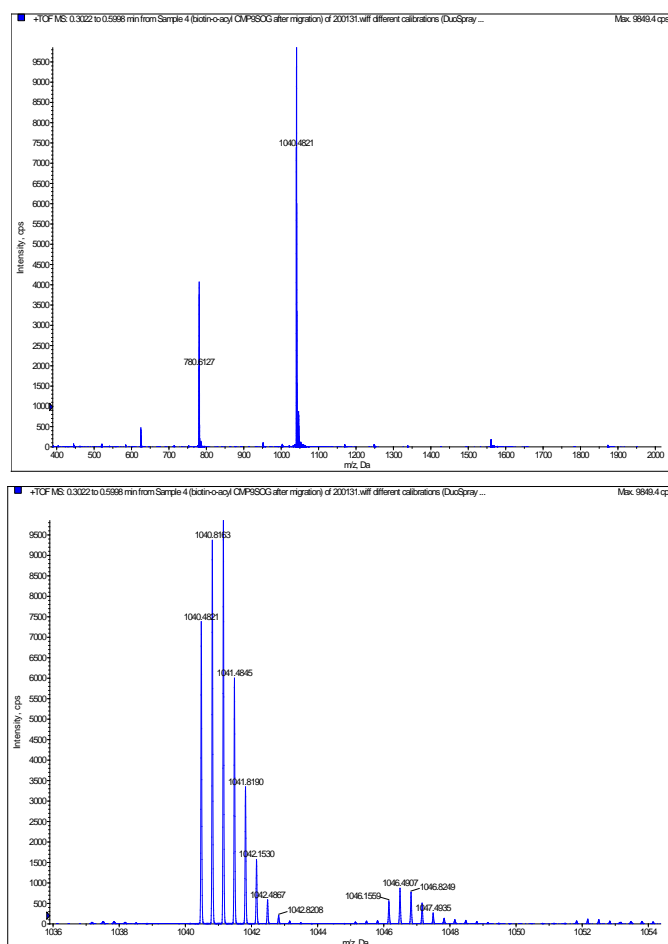

Figure S25. (a) HPLC analysis of the *O*-to-*N* acyl migration of compound **5** in 0.05% TFA/H<sub>2</sub>O (black) and in PBS for 10 min (blue), and compound **6** in 0.05% TFA/H<sub>2</sub>O (red). COSMOSIL 5C<sub>18</sub>-AR-II column (size 4.6 × 250 mm), gradient 10%–30% MeCN/H<sub>2</sub>O (0.05% TFA), 30 min at 60 °C. (b) ESI-MS analysis of a converted compound of **5** in PBS. The retention time of HPLC was different from **5** in 0.05% TFA/H<sub>2</sub>O and the found *m/z* (1040.482 and 1046.156) corresponded with the calculated ones of **6** ([*M*+3*H*]<sup>3+</sup>: 1040.481 and [*M*+2*H*+NH<sub>4</sub>]<sup>3+</sup>: 1046.156).

(a)

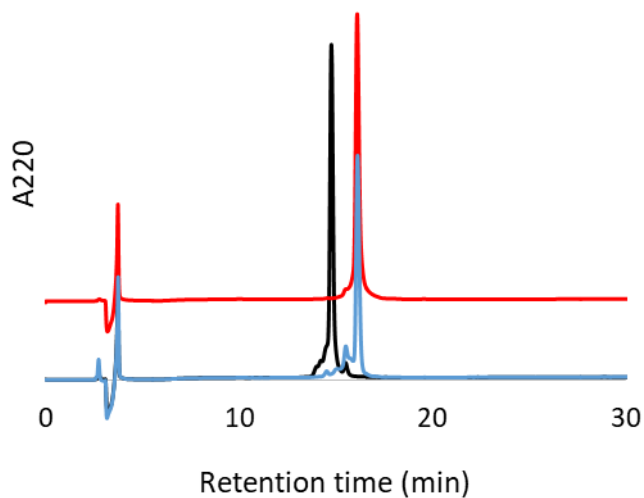

(b)

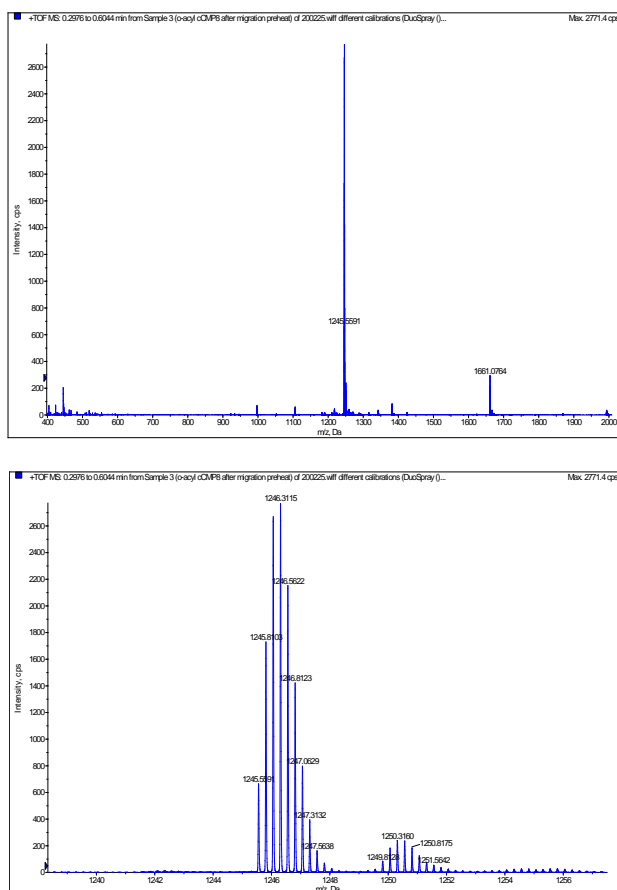

Figure S26. (a) HPLC analysis of the *O*-to-*N* acyl migration of compound **8** in 0.05% TFA/H<sub>2</sub>O (black) and in PBS for 10 min (blue), and compound **9** in 0.05% TFA/H<sub>2</sub>O (red). COSMOSIL 5C<sub>18</sub>-AR-II column (size 4.6 × 250 mm), gradient 10%–30% MeCN/H<sub>2</sub>O (0.05% TFA), 30 min at 60 °C. (b) ESI-MS analysis of a converted compound of **8** in PBS. The retention time of HPLC was different from **8** in 0.05% TFA/H<sub>2</sub>O and the found *m/z* (1245.559 and 1249.813) corresponded with the calculated ones of **9** ([*M*+4*H*]<sup>4+</sup>: 1245.559 and [*M*+3*H*+NH<sub>4</sub>]<sup>4+</sup>: 1249.816).

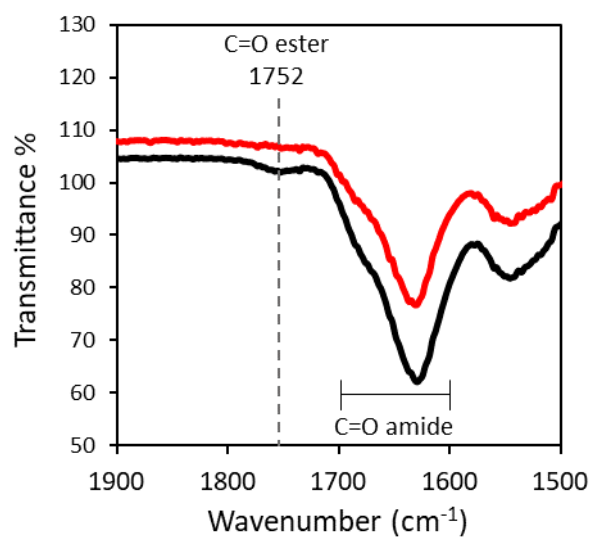

Figure S27. FT-IR spectra of **8** (black) and **9** (red).

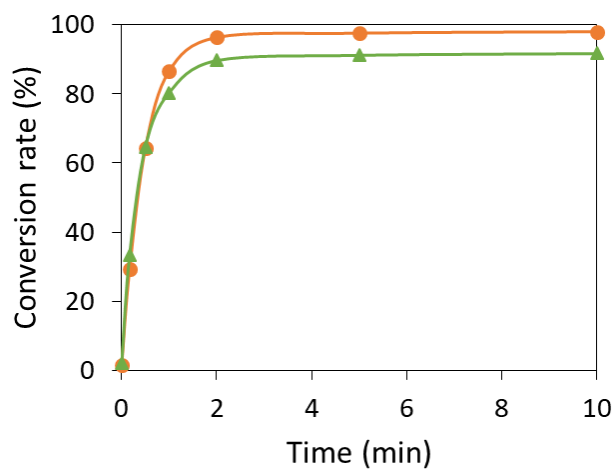

Figure S28. Comparison of the kinetics of the conversion from **3** to **4** (orange) and from **8** to **9** (green).

(a)

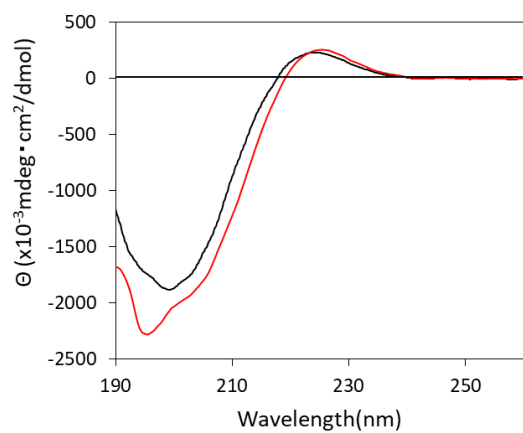

(b)

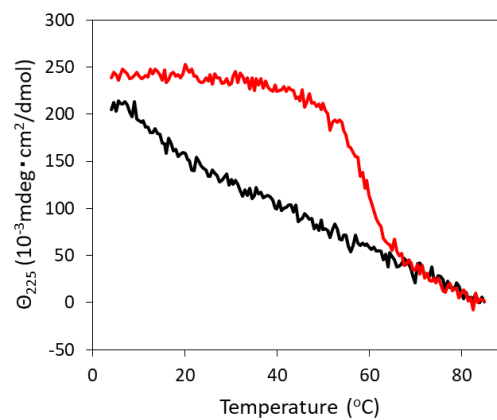

Figure S29. (a) CD spectra recorded in 0.05% TFA/H<sub>2</sub>O at 4 °C. (b) Thermal melting curves of the triple helices. The black and red lines represent compounds **8** and **9**, respectively.

(a)

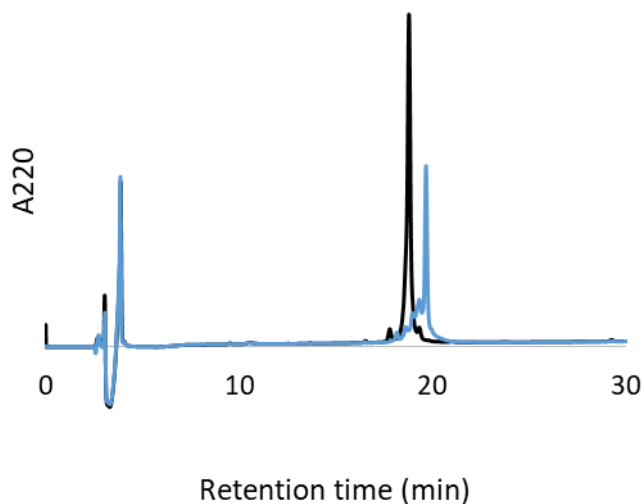

(b)

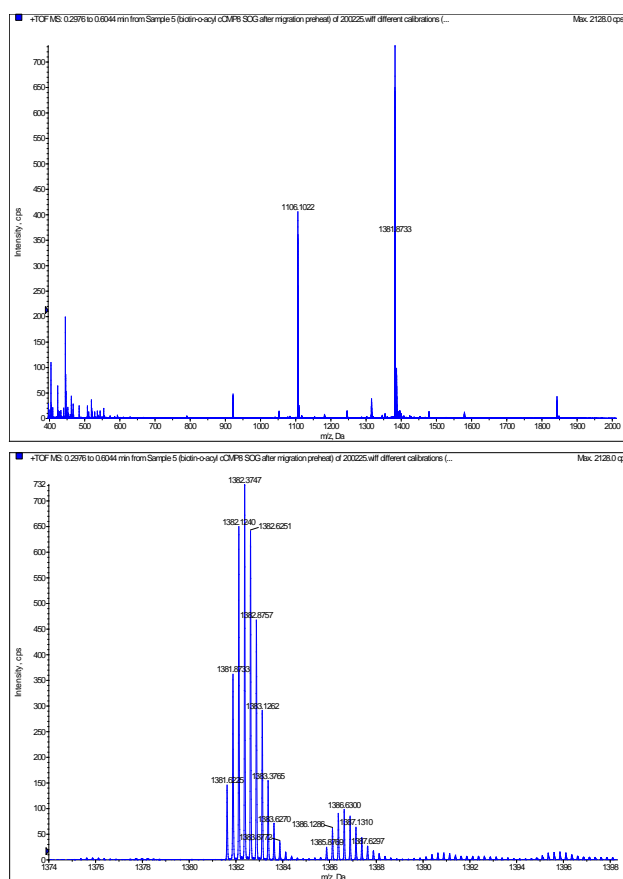

Figure S30. (a) HPLC analysis of the *O*-to-*N* acyl migration of compound **10** in 0.05% TFA/H<sub>2</sub>O (black) and in PBS for 10 min (blue). COSMOSIL 5C<sub>18</sub>-AR-II column (size 4.6 × 250 mm), gradient 10%–30% MeCN/H<sub>2</sub>O (0.05% TFA), 30 min at 60 °C. (b) ESI-MS analysis of a converted compound of **10** in PBS. The retention time of HPLC was different from **10** in 0.05% TFA/H<sub>2</sub>O and the found *m/z* (1381.623 and 1385.877) corresponded with the calculated ones of the converted compound ([*M*+4*H*]<sup>4+</sup>: 1381.623 and [*M*+3*H*+NH<sub>4</sub>]<sup>4+</sup>: 1385.880).

## Reference

1. T. Yoshiya, H. Kawashima, Y. Sohma, T. Kimura, and Y. Kiso, *Org. Biomol. Chem.*, 2009, **7**, 2894-2904.
2. C. N. Pace, F. Vajdos, L. Fee, G. Grimsley, and T. Gray, *Protein Sci.*, 1995, **4**, 2411-2423.
3. M. S. Ackerman, M. Bhate, N. Shenoy, K. Beck, J. A. M. Ramshaw, and B. Brodsky, *J. Biol. Chem.*, 1999, **274**, 7668-7673.
